1 **Title**

2 Role of pre and post interventions on cervical cancer knowledge levels among women students at the University  
3 of Gondar, Gondar, Ethiopia

4 **Short title**

5 Educational interventions and cervical cancer knowledge levels

6 **Authors**

7 **First author**

8 Meera Indracanti\*

9 Assistant professor, Institute of Biotechnology, University of Gondar, Gondar, Ethiopia. Email i.d.:  
10 [drmeerabio@yahoo.com](mailto:drmeerabio@yahoo.com), +251985074609

11 **Second author**

12 Nega Berhane\*

13 Professor, Institute of Biotechnology, University of Gondar, Gondar, Ethiopia. Email i.d.: [tesnega@yahoo.com](mailto:tesnega@yahoo.com),  
14 +251918149759

15 **Third author**

16 Tigist Minyamer

17 Assistant professor, Institute of Biotechnology, University of Gondar, Gondar, Ethiopia. Email i.d.:  
18 [tminyamer@yahoo.com](mailto:tminyamer@yahoo.com) +251912491367.

19 Corresponding authors\*: [drmeerabio@yahoo.com](mailto:drmeerabio@yahoo.com)/[tesnega@yahoo.com](mailto:tesnega@yahoo.com)

20

21

22

23

24

25 **Abstract**

26 **Background**

27 Cervical cancer is the second most common cancer in women aged 44 years and above in Ethiopia. Lack of  
28 awareness about the disease, lack of screening programs and inadequacy of vaccination in most regions of Ethiopia  
29 alarmingly increasing Human papillomavirus (HPV) infections and incidence of the disease. Educational  
30 intervention is a fast and effective primary preventive step to reduce the cervical cancer burden.

31 **Objective**

32 The present study was carried out to understand the impact of knowledge-based intervention and factors  
33 influencing the knowledge levels on young women attending college education at University of Gondar (UoG),  
34 Gondar.

35 **Method**

36 A cross-sectional comparative study was conducted and data was collected using a standardized self-administered  
37 questionnaire in both English and Amharic (Ethiopian main official language) and analysed using the Statistical  
38 Package for the Social Sciences software (SPSS ver.23, IBM).

39 **Results**

40 There was an increase in overall awareness about cervical cancer (symptoms, risk factors, screening methods, and  
41 vaccination) in all post intervened students compared to baseline knowledge levels (before education intervention)  
42 statistically at  $p < 0.001$  significance level. The mean age of the study participants was 20.86 years (SD, 1.86). Out  
43 of total 283 women student participants, overall baseline awareness about cervical cancer symptoms (81.6%,  
44  $p < 0.002$ ), risk factors (94.8%,  $p < 0.001$ ), HPV (60.6%,  $p < 0.001$ ), screening (84.3%,  $p < 0.001$ ) and HPV vaccines  
45 (42.1%,  $p < 0.001$ ) was more in 4<sup>th</sup> year and above over other respondents. After the intervention, knowledge levels  
46 increased in students 3<sup>rd</sup> and above years over 1<sup>st</sup> and 2<sup>nd</sup>-year students irrespective of the branch they belong.  
47 Initial awareness on various broad issues was 8.77 and after education intervention, it was 30.39 with mean overall  
48 knowledge increase of 21.62. However, baseline awareness was better on risk factors and poor on vaccination.  
49 After education intervention, an increase of 246% in overall knowledge about cervical cancer including  
50 symptoms, risk factors, HPV, screening and vaccination. Age, year of study, branch of study and family income  
51 were the explanatory variables significant on overall baseline knowledge levels and after education intervention,  
52 year of study was the only independent variable significant for the overall increase in knowledge levels.

## 53 **Conclusion**

54 The present study suggests that educational intervention as the primary preventive method is effective and young  
55 trained women volunteers belong both rural and urban areas will be important stakeholder to increase positive  
56 attitude to reduce the cervical cancer burden in Ethiopia.

## 57 **Introduction**

58 According to GLOBOCAN 2018 [1], most of the African countries have no official registry to cover the cancer  
59 statistics and it reflects unseen burden including cervical cancer. Cervical cancer is a fourth leading cause for  
60 cancer death is the most common cancer in Sub-Saharan Africa, second leading health problem in Northern Africa  
61 including Ethiopia among women 44 years and above [2-10]. In developing countries, high-risk HPV infections  
62 cause cervical cancer and other serious public health problems [11] due to bare minimal resources to cope with  
63 the situation [12-14].

64 Women are at risk of HPV infections in some point in their life [4, 15]. A variety of clinic-epidemiological risk  
65 factors such as early age of marriage, multiple sexual partners, multiple pregnancies, poor genital hygiene and  
66 smoking and so are often associated with the development of cervical cancer [4, 11, 16, 17]. Most of the women  
67 in developing and under-developed countries do not have access to Pap (Papanicolaou) smear screening [12, 18]  
68 for early detection of HPV infections. Low or absence of any nationwide cervical screening program [19], very  
69 few women receive screening [20] and cancer of cervix remains a major public health problem for Ethiopia [21,  
70 22]. According to Tsegaye et al., 2018 [2], only 0.6% of women in Ethiopia, aged 18-69 years includes, 1.6%  
71 from urban and 0.4% from rural screened every three years. In Ethiopia, every year around 7095 women are  
72 diagnosed with cervical cancer and 4732 dies from this disease [23].

73 Several factors like education, economic status, health facilities influence early detection and treatment of cervical  
74 precancerous lesions [5, 15, 24-26] and reduce cervical cancer morbidity and mortality [27]. The absence of  
75 screening facilities coupled with poor literacy and low level of awareness, less attention to women health further  
76 aggravate the cervical cancer burden [5, 28-30]. Ethiopia has a low level of awareness about cervical cancer and  
77 HPV infections [27]. Various studies [31-33] have been undertaken to assess women's awareness and knowledge  
78 level about cervical cancer. Cervical cancer awareness studies are few in Ethiopia and mostly confined to hospitals  
79 [4, 12, 34]. A recent study on women in the Amhara region has a low level of awareness [5] and factors influence  
80 the levels of knowledge not well known [4].

81 The success and benefit of control and prevention of cervical cancer largely depend to a great extent on the level  
82 of awareness and knowledge about different aspects of the disease and the vaccine [35, 36] and current focus on  
83 risk factors will be beneficial [37] and effective. It is therefore beneficial to understand the baseline knowledge  
84 levels of young women, awareness, and attitude towards cervical cancer and factors influencing their knowledge  
85 levels before and after education intervention towards effective primary preventive measure for control of cervical  
86 cancer burden in Ethiopia. Recent years, few studies were carried out to understand the baseline knowledge levels  
87 at the community level and as well at the university level in some parts of Ethiopia [2] and no study carried out  
88 to measure the knowledge levels and influence of socio-demographic factors before and after the educational  
89 intervention. So, the aim of this study was to explore cervical cancer knowledge levels of the students from two  
90 campuses of University of Gondar (UoG) and influence of any socio-demographic parameters on overall  
91 knowledge levels of study participants before and after the educational intervention.

## 92 **Materials and methods**

### 93 **Study area and subjects**

94 A cross-sectional pre-test/post-test comparative study was conducted to understand the socio-demographic factors  
95 (Independent variables (IVs)) influence on knowledge levels of women students of biological and non-biological  
96 sciences from Tewodros and Marakhi campuses of UoG. These two campuses have colleges for Computational  
97 & Natural Sciences and Management & Economics. The study included written informed consent and data  
98 collection tool was approved by the Department Research Committee, Institute of Biotechnology, UoG. Most of  
99 the students were from different regions of Amhara, Addis Ababa, Oromia and Southern Nations, mostly from  
100 rural areas belong to less educated families with less access to print and visual media.

### 101 **Sample size and questionnaire**

#### 102 **Sample size**

103 In UOG, the number of female students enrolls to different programs is usually a low and average ratio of one  
104 female student to five male students. Any women aged 17 to 30 years enrolled in university graduate or  
105 postgraduate programs were invited to participate in the study. The study was conducted in a total of 283  
106 undergraduate and postgraduate female students aged between 17–30 years. Based on the pilot study, the sample  
107 size was calculated using a formula for finite population [38]. The assumption was 50% of the university students  
108 had sufficient knowledge of cervical cancer, a sample of 283 students was selected by stratified random sampling

109 techniques with 95% confidence and 5% reliability. Respondents were enrolled using a multistage sampling  
110 technique. Enrolled female students with eligible age volunteered to participate and signed written consent form  
111 were included in the study.

## 112 **Questionnaire development**

113 The questionnaire was designed and developed based on study objectives, literature review, and pilot study. An  
114 initial pilot study was carried out from May-June 2017 at the University of Gondar, Tewodros and Marakhi  
115 campuses, to test the data collection tool in English includes seven sections with 78 questions. During September-  
116 February' 2018, the study was carried out using modified data collection tool consists of seven sections include  
117 56 items both open- and close-ended questions in English and Amharic languages as most students preferred to  
118 use the questionnaire in Amharic.

119 The six-part questionnaire included socio-demographic characteristics and questions regarding the knowledge  
120 about different aspects of cervical cancer like: (1) Demographic characteristics, such as age, sex, religion,  
121 biological or non-biological sciences as study background, place of residence, father's and mother's educational  
122 qualifications and occupation, family size, family income of the students. (2) Awareness and knowledge of  
123 cervical cancer symptoms, (3) Knowledge of risk factors, (4) Knowledge of HPV, (5) Knowledge of cervical  
124 cancer screening, (6) Awareness and knowledge about HPV vaccine and awareness and perception towards  
125 screening, concern/acceptability of vaccination, health-seeking behaviour and preferences of venue for screening  
126 and vaccination.

127 Categorical data on various socio-demographic factors, continuous data on family income and age were collected.  
128 The purpose and importance of the study were explained to the participants prior to obtaining written informed  
129 consent and the confidentiality of their identities was ensured. The questionnaire was administered to the female  
130 students and the data from the questionnaire was processed anonymously by assigning random codes.  
131 Confidentiality of the information was maintained throughout by excluding names or I.D. Nos. in the  
132 questionnaire during data collection. Students were categorized into groups based on different factors, in order to  
133 examine which socio-demographic factors were strongly associated with the knowledge, awareness, and attitudes  
134 towards cervical cancer, HPV and vaccination. According to age, students were divided into two categories: young  
135 females aged 17 to 20 years and adult females aged 21 years & above. The education level of the students was  
136 classified into four groups: (i) first year, (ii) the second year, (iii) the third year, and (iv) fourth year & above. The  
137 household income per month was an open-ended question and based on the response it was classified into three

138 categories as follows (i) <2000 birr (ii) >=2000-5000 birr (iii) >5000 birr and above. Knowledge levels of  
139 respondents regarding symptoms, risk factors, HPV and its relationship with cervical cancer, prevention methods  
140 like screening and vaccination was measured using a 42 item instrument. A score of 1 was allocated for a  
141 good/correct answer and 0 for a wrong answer or “Do not know”. The maximum possible score was 42. Mean  
142 score used to estimate the cumulative mean score of knowledge levels of cervical cancer. The total score was  
143 divided into, those scored above 31 or more were categorized as having very good (“sufficient”) knowledge; the  
144 others were categorized “good NK” with 23 to 31, fair with score 13-22 and poor NK was 1-12 and zero score  
145 categorized as “no” knowledge. Source of information, awareness and perception, concern and acceptability,  
146 health-seeking behaviour and choice of venue for screening and vaccination were measured before and after  
147 educational intervention and descriptive statistics were used to measure the change in response.

#### 148 **Statistical analysis**

149 All variables of interest in the study population were summarized using descriptive statistics. For continuous  
150 variable age, means and standard deviations were generated. Univariate analysis was conducted to generate  
151 frequencies and percentages for categorical variables and were used to describe the characteristics of the study  
152 population in relation to relevant variables. Proportions were compared by using Chi<sup>2</sup> tests, or Fisher’s exact tests,  
153 as appropriate. McNemar  $\chi^2$  test to determine the change between pre and post-intervention knowledge levels  
154 were statistically significant. The impact of socio-demographic characteristics on knowledge levels of cervical  
155 cancer was investigated using bivariate method. Binary logistic regression used to find out the statistical  
156 association between the outcome variable and the explanatory variables. Finally, explanatory variables with p-  
157 value less than 0.2 in the bivariate analysis were included and multivariate and multinomial linear regression  
158 analyses were conducted to investigate factors predict cervical cancer and Pap smear test awareness and/or  
159 utilization of Pap smear test and to examine the correlation of baseline cervical cancer knowledge scores as well  
160 as changes in scores after the educational intervention. Odds ratio and 95% confidence interval were also used to  
161 identify the presence and strength of association wherever appropriate. All tests of significance were two-tailed  
162 at 5% level. For regression analysis, the reference category was the most common category of an independent  
163 variable (IV).

#### 164 **Results**

165 A total of 283 study participants, both from biological and non-biological sciences attended the educational  
166 training on cervical cancer general awareness and responded to both pre-intervention and post-intervention

167 questionnaires (Table 1). The dependent variables (DVs) were compared descriptively with respect to socio-  
168 demographic characteristics. The categorical variables were expressed as percentages. Pre-post education  
169 intervention differences for knowledge scores and the proportion of correct responses for each question  
170 summarized (Table 2). Baseline knowledge was low among all groups, with scores better among older  
171 participants. The baseline knowledge about awareness, symptoms, risk factors, HPV, screening and vaccination  
172 were low among non-biological science students (Table 3). A brief, structured presentation increased cervical  
173 cancer awareness knowledge among all groups. On average, knowledge scores significantly improved from 8 to  
174 26 after the presentation (maximum possible score 42;  $P < .001$ ), irrespective of region, year of study, branch of  
175 study, and age. The baseline average score of 9 for students age 20 and above and 7 in students below 20 years,  
176 and after education intervention score increased to 24 and 28 in age 20 years below and above groups respectively.  
177 Fourth-year and above students showed a baseline score of 11 and first-year students had the lowest baseline score  
178 6 irrespective of the branch. After education intervention, the average score of students increased in the order of  
179 third year 31, fourth year 29, first year 27 and 22 second year.

#### 180 **Socio-demographic characteristics of the study population**

181 Demographic characteristics of the 283 female students are summarized in Table 1. Students belong to first year  
182 (18.4%), second-year (42.4%), third-year (25.8%) and fourth year & above (13.4%). The students belonged to  
183 biological sciences (45.2%) and non-biological sciences (54.8%). The mean age was 20.86 years (Sdv. 1.86) (17–  
184 30 years) with 45.9% in 17–20-year-old range and 54.1% in 21 and above years range. Students belong to Addis  
185 Ababa (19.8%), Amhara (47.7%), Oromia (9.2%), other regions (17%) and missing regions (6.4%) and were  
186 belong to either rural (43.5%), or urban (50.9%) and 5.7% of students' information was missing, not included in  
187 the analysis. Majority of the participants 244 (86.2%) were Orthodox Christians, while 39 (13.8%) belonged to  
188 other religions (Muslims and other Christians). Most of the respondents 262 (92.6%) were never married and 21  
189 (7.4%) students were married. Study participants father's educational levels were, illiterates 83 (29.3%), up to  
190 10<sup>th</sup> grade 156 (55.1%) and above 10<sup>th</sup> grade 44 (15.5%) and mother's educational levels were, illiterate 108  
191 (38.2%), up to 10<sup>th</sup> grade 144 (50.9%) and above 10<sup>th</sup> grade 31(11.0%). Respondents father's occupation was  
192 either employed 96 (33.9%), business, 69 (24.4%) or other occupation 118 (41.7%). Only 58(20.5%) of the  
193 participant's mothers were employed, 77 (27.2%) were either business or related occupation and most were 148  
194 (52.3%) homemakers. 179 (63.3) had 5 or less numb of siblings and 104 (36.7%) had >5 siblings. 211 (74.6%)  
195 had both brothers and sisters and 72 (25.4%) belonged to other combinations (only brothers/sisters/no sibling).  
196 Most of the participants 207 (73.1%) family income were <2000 birr, 54 (19.1%) families had monthly income

197 >=2000-5000 birr and only 22 (7.8%) had >=5000 birr as monthly income. Responses to questions on selected  
 198 domains were presented in table 2.

199 **Awareness of women about cervical cancer and its preventable nature**

| 200 | The women | <b>Demographic characteristics</b> | <b>Total population responding (N)</b> | <b>Percentage (%)</b> | were asked if they have ever |
|-----|-----------|------------------------------------|----------------------------------------|-----------------------|------------------------------|
| 202 | heard of  | <b>Region</b>                      |                                        |                       | cervical cancer. Before      |
|     |           | Addis Ababa                        | 56                                     | 19.8                  |                              |
|     |           | Amhara                             | 135                                    | 47.7                  |                              |
| 205 | education | Oromia                             | 26                                     | 9.2                   | intervention, one hundred    |
|     |           | Other regions                      | 48                                     | 17                    |                              |
| 207 | sixteen   | Missing regions                    | 18                                     | 6.4                   | (41.0%) women reported that  |
|     |           | <b>Rural/Urban</b>                 |                                        |                       |                              |
|     |           | Rural                              | 123                                    | 43.5                  |                              |
| 209 | they had  | Urban                              | 144                                    | 50.9                  | heard about cervical cancer  |
|     |           | Missing                            | 16                                     | 5.7                   |                              |
| 210 | and after | <b>Year of Study</b>               |                                        |                       | education intervention two   |
|     |           | 1 <sup>st</sup> year UG            | 52                                     | 18.4                  |                              |

212 hundred and fifty-three students (89.4%) aware about cervical cancer (Table 2). 38 (13.4%) participants were well  
 213 aware of the preventable nature of cervical cancer before education intervention (Table 2) of this 25 (66%)  
 214 participants belonged to biological sciences and 13 (34%) were belong to non-biological sciences (Table 3). After  
 215 educational intervention 142 (50%) could learn the preventable nature of cervical cancer and of this 67 (47%)  
 216 participants belonged to biological sciences and 75 (53%) were belong to non-biological sciences.

217 **Knowledge about the symptoms of cervical cancer**

218 Eight questions were asked about the symptoms, and at baseline knowledge was the least about the causes of  
 219 cervical cancer, only 23 (8.1%) students correctly answered and but after education intervention 217 (76.7%)  
 220 students reported that they know about the causes of cervical cancer (Table 2). Similarly, before the intervention,  
 221 persistent vaginal discharge could be a symptom was most correctly answered by 71 (25.1%) students. However,  
 222 one hundred and fifty-five (54.77%) of the respondents did not know any symptom and symptoms associated with  
 223 cervical cancer before educational intervention and this includes 98 (63.22%) respondents from non-biological  
 224 sciences and 57 (36.77%) biological sciences. After educational intervention, 90.46% of study respondents could  
 225 respond to any of the cervical cancer symptoms correctly. Non-biological science students showed a higher  
 226 increase in awareness about symptoms compared to students belong to biological sciences (Table 3). Overall mean  
 227 level knowledge about the symptoms of cervical cancer before the intervention was 1.74 after education  
 228 intervention was 6.81 with a mean increase of 5.07 (Table 5).

229 Table 1: Socio-economic characteristics of study respondents



|     |                                   |     |      |
|-----|-----------------------------------|-----|------|
| 230 | 2 <sup>nd</sup> year UG           | 120 | 42.4 |
|     | 3 <sup>rd</sup> year UG           | 73  | 25.8 |
| 231 | 4 <sup>th</sup> year UG and above | 38  | 13.4 |
|     | <b>Branch of Study</b>            |     |      |
| 232 | Biological Sciences               | 128 | 45.2 |
| 233 | Non-Biological Sciences           | 155 | 54.8 |
|     | <b>Marital Status</b>             |     |      |
| 234 | Never married                     | 262 | 92.6 |
|     | Ever married                      | 21  | 7.4  |
|     | <b>Religion</b>                   |     |      |
| 235 | Orthodox Christian                | 244 | 86.2 |
| 236 | Muslim & Others                   | 39  | 13.8 |
|     | <b>Father's Education Level</b>   |     |      |
| 237 | Illiterate                        | 83  | 29.3 |
|     | Up to 10 <sup>th</sup> grade*     | 156 | 55.1 |
| 238 | Above 10 <sup>th</sup> grade**    | 44  | 15.5 |
|     | <b>Mother's Education Level</b>   |     |      |
| 239 | Illiterate                        | 108 | 38.2 |
|     | Up to 10 <sup>th</sup> grade      | 144 | 50.9 |
| 240 | Above 10 <sup>th</sup> grade      | 31  | 11.0 |
|     | <b>Father's Occupation</b>        |     |      |
| 241 | Employed                          | 96  | 33.9 |
|     | Business                          | 69  | 24.4 |
| 242 | Others                            | 118 | 41.7 |
|     | <b>Mother's Occupation</b>        |     |      |
| 243 | Employed                          | 58  | 20.5 |
|     | Business & others                 | 77  | 27.2 |
| 244 | Homemaker                         | 148 | 52.3 |
|     | <b>Family Income</b>              |     |      |
| 245 | <2000 birr                        | 207 | 73.1 |
|     | >=2000-5000 birr                  | 54  | 19.1 |
| 246 | >=5000 birr                       | 22  | 7.8  |
|     | <b>Family size</b>                |     |      |
| 247 | 1-5                               | 179 | 63.3 |
|     | >5                                | 104 | 36.7 |
|     | <b>Sibling combination</b>        |     |      |
| 248 | Both brothers and sisters         | 211 | 74.6 |
| 249 | Other combinations                | 72  | 25.4 |
|     | <b>Total sample size</b>          | 283 | 100  |

\*Attended or completed Primary or Secondary level,

\*\*Attended or completed Higher Secondary and above.

**The mean age of the study respondents is 20.86 years (Sdv. 1.86)**

252  
253  
254  
255  
256  
257  
258  
259  
260  
261  
262  
263  
264  
265  
266  
267  
268

269  
270  
271  
272  
273  
274  
275  
276

Table 2: Awareness and sources of information about cervical cancer

| Domains inquired                                                              | Pre-intervention               |                                 | Post-intervention              |                                 | The difference in awareness (%) |
|-------------------------------------------------------------------------------|--------------------------------|---------------------------------|--------------------------------|---------------------------------|---------------------------------|
|                                                                               | Number correctly responded (N) | Percent correctly responded (%) | Number correctly responded (N) | Percent correctly responded (%) |                                 |
| <b>General awareness</b>                                                      |                                |                                 |                                |                                 |                                 |
| Ever heard of cervical cancer.                                                | 116                            | 41.0                            | 253                            | 89.4                            | 48.4                            |
| Cervical cancer is a curable disease?                                         | 38                             | 13.4                            | 142                            | 50.2                            | 36.8                            |
| <b>Knowledge about symptoms</b>                                               |                                |                                 |                                |                                 |                                 |
| Do you know the causes of cervical cancer are?                                | 23                             | 8.1                             | 217                            | 76.7                            | 68.6                            |
| Persistent vaginal discharge that smells unpleasant.                          | 71                             | 25.1                            | 210                            | 74.2                            | 49.1                            |
| Whether vaginal bleeding between periods could be a sign?                     | 43                             | 15.2                            | 178                            | 62.9                            | 47.7                            |
| Do you think menorrhagia is a symptom for cervical cancer?                    | 52                             | 18.4                            | 203                            | 71.7                            | 53.3                            |
| Vaginal bleeding after the menopause could be a sign.                         | 52                             | 18.4                            | 183                            | 64.9                            | 46.5                            |
| Persistent pelvic pain could be a sign.                                       | 39                             | 13.8                            | 182                            | 64.3                            | 50.5                            |
| Discomfort or pain during sex could be a sign.                                | 64                             | 22.6                            | 174                            | 61.5                            | 38.9                            |
| Vaginal bleeding during or after sex could be a sign.                         | 49                             | 17.3                            | 196                            | 69.3                            | 52.0                            |
| <b>Knowledge about risk factors</b>                                           |                                |                                 |                                |                                 |                                 |
| Whether poor hygiene is a risk factor?                                        | 95                             | 33.6                            | 195                            | 68.9                            | 35.3                            |
| Whether coitus at an early age is a risk factor?                              | 81                             | 28.6                            | 196                            | 69.3                            | 40.7                            |
| Whether multiple sex partners is a risk factor?                               | 101                            | 35.7                            | 226                            | 79.9                            | 44.2                            |
| Do you think unprotected intercourse could be a risk factor for cc?           | 97                             | 34.3                            | 222                            | 78.4                            | 44.1                            |
| Do you think consuming contraceptive pills could be a risk factor?            | 49                             | 17.3                            | 179                            | 63.3                            | 46.0                            |
| No knowledge of cervical cancer is a risk factor?                             | 103                            | 36.4                            | 194                            | 68.6                            | 32.2                            |
| Swelling of the cervix is a risk factor?                                      | 67                             | 23.7                            | 166                            | 58.7                            | 35.0                            |
| Whether high parity is a risk factor?                                         | 43                             | 15.2                            | 137                            | 48.4                            | 33.2                            |
| Do you think smoking could be a risk factor for cervical cancer?              | 55                             | 19.4                            | 193                            | 68.2                            | 48.8                            |
| <b>Knowledge about Human Papilloma Virus (HPV)</b>                            |                                |                                 |                                |                                 |                                 |
| Causative organism of cervical cancer.                                        | 47                             | 16.6                            | 222                            | 78.4                            | 61.8                            |
| Are you aware what is HPV and its relation with cervical cancer?              | 29                             | 10.2                            | 204                            | 72.1                            | 61.9                            |
| HPV can infect women and can cause cervical cancer.                           | 59                             | 20.8                            | 224                            | 79.1                            | 58.3                            |
| HPV is a sexually transmitted infection.                                      | 43                             | 15.2                            | 194                            | 68.6                            | 53.4                            |
| HPV infections are usually obvious and most infections resolve by themselves. | 36                             | 12.7                            | 134                            | 47.3                            | 34.6                            |
| HPV cannot infect men.                                                        | 36                             | 12.7                            | 103                            | 36.4                            | 23.7                            |
| HPV infections can cause genital warts.                                       | 39                             | 13.8                            | 153                            | 54.1                            | 40.3                            |
| HPV infections can cause oral/pharyngeal cancer.                              | 33                             | 11.7                            | 138                            | 48.8                            | 37.1                            |
| HPV infections can cause anal cancer.                                         | 27                             | 9.5                             | 59                             | 20.8                            | 11.3                            |
| <b>Knowledge about screening</b>                                              |                                |                                 |                                |                                 |                                 |
| Ever heard of screening.                                                      | 64                             | 22.6                            | 215                            | 76.0                            | 53.4                            |
| Are you aware of any screening method?                                        | 57                             | 20.1                            | 258                            | 91.2                            | 71.1                            |
| Have you ever heard of the Pap smear test?                                    | 84                             | 29.7                            | 233                            | 82.3                            | 52.6                            |
| Pap smear test is used for.                                                   | 38                             | 13.4                            | 156                            | 55.1                            | 41.7                            |
| At what age women should start screening.                                     | 50                             | 17.7                            | 161                            | 56.9                            | 39.2                            |
| How often a woman should undergo screening.                                   | 78                             | 27.6                            | 175                            | 61.8                            | 27.6                            |
| Pap smear test can pick up cell changes that may go to become cc.             | 16                             | 5.7                             | 176                            | 62.2                            | 56.5                            |
| <b>Knowledge about vaccination</b>                                            |                                |                                 |                                |                                 |                                 |
| HPV vaccine exists that protects against cervical cancer.                     | 40                             | 14.0                            | 216                            | 76.3                            | 62.3                            |
| A vaccine for HPV is not available to men.                                    | 23                             | 8.1                             | 84                             | 29.7                            | 21.6                            |
| Can HPV vaccines be given to boys?                                            | 25                             | 8.8                             | 143                            | 50.5                            | 41.7                            |
| To which age group HPV vaccine should be given.                               | 14                             | 4.9                             | 51                             | 18.0                            | 13.1                            |
| HPV vaccine exists that can protect against genital warts.                    | 45                             | 15.9                            | 160                            | 56.5                            | 40.6                            |
| HPV vaccines available to protect against non-cervical cancers?               | 13                             | 4.6                             | 89                             | 31.4                            | 26.8                            |
| Most appropriate stage for HPV vaccination.                                   | 39                             | 13.8                            | 119                            | 42.0                            | 28.2                            |
| <b>Total sample size</b>                                                      | <b>283</b>                     | <b>100</b>                      | <b>283</b>                     | <b>100</b>                      |                                 |

277

278 Table 3: Impact of education intervention on cervical cancer awareness on biological (BS) and non-biological science (NBS). **Pre IV**: Pre-  
 279 intervention; **Post IV**: Post intervention. **KL**: Knowledge level; **Zero**=No knowledge; **Poor**=1-3 correct responses; **Fair**: 4-6 correct  
 280 responses; **Good**: 6 and above correct responses. Values are in percentage (%) at P=0.05 significance level; NS=Not significant

| Group<br>KL | Symptoms |      |                       |      | Risk Factors |      |         |      | Human Papilloma Virus |      |         |      | Screening |      |                       |      | Vaccination          |      |                       |      |
|-------------|----------|------|-----------------------|------|--------------|------|---------|------|-----------------------|------|---------|------|-----------|------|-----------------------|------|----------------------|------|-----------------------|------|
|             | Pre IV   |      | Post IV <sup>NS</sup> |      | Pre IV       |      | Post IV |      | Pre IV                |      | Post IV |      | Pre IV    |      | Post IV <sup>NS</sup> |      | Pre IV <sup>NS</sup> |      | Post IV <sup>NS</sup> |      |
|             | BS       | NBS  | BS                    | NBS  | BS           | NBS  | BS      | NBS  | BS                    | NBS  | BS      | NBS  | BS        | NBS  | BS                    | NBS  | BS                   | NBS  | BS                    | NBS  |
| <b>Zero</b> | 29.7     | 47.1 | 3.1                   | 7.1  | 27.3         | 42.6 | 3.9     | 10.3 | 49.2                  | 65.8 | 3.9     | 10.3 | 28.9      | 38.1 | 4.7                   | 6.5  | 60.9                 | 69.7 | 8.6                   | 10.3 |
| <b>Poor</b> | 39.8     | 35.5 | 7.8                   | 11.0 | 32.8         | 27.7 | 10.9    | 3.9  | 32.8                  | 21.9 | 14.8    | 14.8 | 42.2      | 47.1 | 9.4                   | 7.1  | 29.7                 | 20.0 | 33.6                  | 23.2 |
| <b>Fair</b> | 19.5     | 16.1 | 21.9                  | 13.5 | 28.1         | 26.5 | 34.4    | 36.8 | 14.1                  | 11.6 | 43.8    | 48.4 | 22.7      | 14.2 | 28.9                  | 31.6 | 8.6                  | 8.4  | 37.5                  | 45.8 |
| <b>Good</b> | 10.9     | 1.3  | 67.2                  | 68.4 | 11.7         | 3.2  | 50.8    | 49.0 | 3.9                   | 0.6  | 37.5    | 26.5 | 6.3       | 0.6  | 57.0                  | 54.8 | 0.8                  | 1.9  | 20.3                  | 20.6 |

281

282

283 Table 4a & 4b: Impact of education intervention on cervical cancer awareness on the year of study. **Pre IV**: Pre-intervention; **Post IV**: Post  
 284 intervention. **KL**: Knowledge level; **Zero**=No knowledge; **Poor**=1-3 correct responses; **Fair**: 4-6 correct responses; **Good**: 6 and above correct  
 285 responses. Values are in percentage (%) at P=0.002 significance level.

| Year/<br>KL | Symptoms                          |                 |                 |                  | Risk Factors    |                 |                 |                  | Human Papilloma Virus       |                 |                 |                  | Screening                    |                 |                 |                  | Vaccination     |                 |                 |                 |
|-------------|-----------------------------------|-----------------|-----------------|------------------|-----------------|-----------------|-----------------|------------------|-----------------------------|-----------------|-----------------|------------------|------------------------------|-----------------|-----------------|------------------|-----------------|-----------------|-----------------|-----------------|
|             | Broad category                    |                 |                 |                  |                 |                 |                 |                  | Pre-intervention<br>(N=283) |                 |                 |                  | Post-intervention<br>(N=283) |                 |                 |                  | Difference      |                 |                 |                 |
|             | 1 <sup>st</sup>                   | 2 <sup>nd</sup> | 3 <sup>rd</sup> | 4 <sup>th*</sup> | 1 <sup>st</sup> | 2 <sup>nd</sup> | 3 <sup>rd</sup> | 4 <sup>th*</sup> | 1 <sup>st</sup>             | 2 <sup>nd</sup> | 3 <sup>rd</sup> | 4 <sup>th*</sup> | 1 <sup>st</sup>              | 2 <sup>nd</sup> | 3 <sup>rd</sup> | 4 <sup>th*</sup> | 1 <sup>st</sup> | 2 <sup>nd</sup> | 3 <sup>rd</sup> | 4 <sup>th</sup> |
|             | Symptoms                          |                 |                 |                  |                 |                 |                 |                  | 1.74                        |                 |                 |                  | 6.81                         |                 |                 |                  | 5.07            |                 |                 |                 |
|             | Risk factors                      |                 |                 |                  |                 |                 |                 |                  | 2.71                        |                 |                 |                  | 6.7                          |                 |                 |                  | 3.99            |                 |                 |                 |
|             | HPV                               |                 |                 |                  |                 |                 |                 |                  | 1.37                        |                 |                 |                  | 5.61                         |                 |                 |                  | 4.24            |                 |                 |                 |
|             | Screening                         |                 |                 |                  |                 |                 |                 |                  | 1.95                        |                 |                 |                  | 6.93                         |                 |                 |                  | 4.98            |                 |                 |                 |
|             | Vaccination                       |                 |                 |                  |                 |                 |                 |                  | 1.0                         |                 |                 |                  | 4.34                         |                 |                 |                  | 3.34            |                 |                 |                 |
|             | <b>Overall knowledge about CC</b> |                 |                 |                  |                 |                 |                 |                  | <b>8.77</b>                 |                 |                 |                  | <b>30.39</b>                 |                 |                 |                  | <b>21.62</b>    |                 |                 |                 |
| <b>Zero</b> | 57.7                              | 42.5            | 31.5            | 18.4             | 53.8            | 34.2            | 41.1            | 5.3              | 75.0                        | 60.8            | 52.1            | 39.5             | 50.0                         | 38.3            | 24.7            | 15.8             | 78.8            | 67.5            | 57.5            | 57.9            |
| <b>Poor</b> | 25.0                              | 37.5            | 42.5            | 44.7             | 17.3            | 24.2            | 34.2            | 57.9             | 13.5                        | 27.5            | 24.7            | 47.4             | 28.8                         | 39.2            | 54.8            | 65.8             | 15.4            | 24.2            | 26.0            | 34.2            |
| <b>Fair</b> | 9.6                               | 18.3            | 20.5            | 21.1             | 23.1            | 33.3            | 21.9            | 23.7             | 11.5                        | 9.2             | 21.9            | 7.9              | 15.4                         | 19.2            | 20.5            | 13.2             | 5.8             | 6.7             | 15.1            | 5.3             |
| <b>Good</b> | 7.7                               | 1.7             | 5.5             | 15.8             | 5.8             | 8.3             | 2.7             | 13.2             | 0                           | 2.5             | 1.4             | 5.3              | 5.8                          | 3.3             | 0               | 5.3              | 0               | 1.7             | 1.4             | 2.6             |

286

| Year/<br>KL | Symptoms        |                 |                 |                  | Risk Factors    |                 |                 |                  | Human Papilloma Virus |                 |                 |                  | Screening       |                 |                 |                  | Vaccination     |                 |                 |                 |
|-------------|-----------------|-----------------|-----------------|------------------|-----------------|-----------------|-----------------|------------------|-----------------------|-----------------|-----------------|------------------|-----------------|-----------------|-----------------|------------------|-----------------|-----------------|-----------------|-----------------|
|             | 1 <sup>st</sup> | 2 <sup>nd</sup> | 3 <sup>rd</sup> | 4 <sup>th*</sup> | 1 <sup>st</sup> | 2 <sup>nd</sup> | 3 <sup>rd</sup> | 4 <sup>th*</sup> | 1 <sup>st</sup>       | 2 <sup>nd</sup> | 3 <sup>rd</sup> | 4 <sup>th*</sup> | 1 <sup>st</sup> | 2 <sup>nd</sup> | 3 <sup>rd</sup> | 4 <sup>th*</sup> | 1 <sup>st</sup> | 2 <sup>nd</sup> | 3 <sup>rd</sup> | 4 <sup>th</sup> |
| <b>Zero</b> | 1.9             | 11.7            | 0               | 0                | 3.8             | 15.8            | 0               | 0                | 0                     | 17.5            | 0               | 0                | 0               | 12.5            | 0               | 2.6              | 5.8             | 18.3            | 2.7             | 0               |
| <b>Poor</b> | 3.8             | 20.0            | 0               | 2.6              | 5.8             | 10.0            | 4.1             | 5.3              | 13.5                  | 18.3            | 9.6             | 15.8             | 9.6             | 11.7            | 1.4             | 7.9              | 34.6            | 35.8            | 11.0            | 26.3            |
| <b>Fair</b> | 19.2            | 13.3            | 19.2            | 23.7             | 32.7            | 37.5            | 32.9            | 39.5             | 55.8                  | 37.5            | 57.5            | 39.5             | 25.0            | 34.2            | 30.1            | 26.3             | 46.2            | 29.2            | 56.2            | 50.0            |
| <b>Good</b> | 75.0            | 55.0            | 80.8            | 73.7             | 57.7            | 36.7            | 63.0            | 55.3             | 30.8                  | 26.7            | 32.9            | 44.7             | 65.4            | 41.7            | 68.5            | 63.2             | 13.5            | 16.7            | 30.1            | 23.7            |

287 Table 5: Mean level of awareness on various broad issues (categories) of Cervical Cancer (CC)

288

289

290

291

292

### 293 Knowledge about the risk factors of cervical cancer

294 To assess knowledge about the cervical cancer risk factors, nine questions including multiple sexual partners, poor  
 295 hygiene, no knowledge on cervical cancer and cigarette smoking could promote cervical cancer were asked to  
 296 study participants (Table 2). About 35.6 % (n=101) study respondents had no idea about risk factors associated  
 297 with the disease before educational intervention and only 7.4% (n=21) students could not identify any of the risk  
 298 factors even after educational intervention. Before the intervention, 43 (15.2%) students felt high parity could be  
 299 a risk factor and after the educational intervention, 137 (48.4%) could felt high parity could be a risk factor and it  
 300 was the least correctly responded question among the nine risk factors were asked. One hundred and eighty-two

301 (64.4%) study participants were able to identify minimum one risk factor before intervention and 101 (35.6%)  
302 includes 66 (22.96%) respondents from non-biological sciences and 35 (12.36%) respondents of biological  
303 sciences could not identify a single risk factor correctly. After educational intervention, biological science students  
304 showed the highest increase in awareness about risk factors compared to students from non-biological sciences  
305 (Table 3). More than 95 (33%) students identified, multiple sex partners, poor hygiene, no awareness of cervical  
306 cancer, unprotected intercourse could be risk factors (Table 2). Mean baseline awareness about the risk factors  
307 was 2.71, which was highest compared to other categories of the questionnaire and after intervention an overall  
308 increase of 6.7.

### 309 **Knowledge about the HPV and its relationship with cervical cancer**

310 Nine different questions like the causative organism, mode of transmission of HPV and different diseases in male  
311 and females were asked about HPV and its relationship with cervical cancer to understand the knowledge levels  
312 before and after the educational intervention. Before the educational intervention, 43 (15.2%) of study respondents  
313 were not aware of STD nature of HPV infections and different diseases caused by it and 194 (68.6%) women  
314 responded correctly after post-intervention (Table 2). Before the educational intervention, 16.6% and after  
315 intervention 78.4% female students aware HPV as cervical cancer causative organism. HPV can cause anal  
316 cancers was the least correctly answered before (9.5%) and even after (20.8%) education intervention. Twenty-  
317 nine (10.2%) respondents before intervention were aware of HPV and its relationship with cervical cancer and  
318 204 (72.1%) students identified correctly the HPV relationship with mean 61.9% increase after post-intervention  
319 (Table 2). 102 (36.04%) respondents from non-biological sciences and 62 (21.9%) biological sciences had no  
320 baseline awareness about HPV and its relationship with different diseases. After educational intervention, non-  
321 biological science students showed the highest increase in awareness about HPV compared to students belong to  
322 biological sciences (Table 3). Overall mean knowledge level before the intervention was 1.37, and after the  
323 intervention was 5.61 with an increase of 4.24 (Table 5).

### 324 **Knowledge about the screening of cervical cancer**

325 There were seven different questions like heard of cervical cancer screening, any screening method, Pap smear  
326 test, and its importance, when should women start screening and how often should be screened. Before the  
327 educational intervention, only 19.7% of total respondents were aware of screening and 69.32% women could  
328 respond correctly after intervention (Table 2). How often women should undergo screening was correctly  
329 responded by 27.6% before intervention and 61.8% of respondents answered correctly after the intervention. Only

330 5.7% of respondents' identified Pap smear test can pick cell changes before intervention and it increased to 62.2%  
331 after educational intervention. 95 (33.56%) study respondents had no baseline knowledge about screening and its  
332 importance with 37 (13.07%) respondents belong to biological and 58 (20.49%) non-biological sciences. After  
333 intervention, 43.1% (n=122) biological and 51.23% (n=145) non-biological sciences showed awareness about  
334 screening (Table 3). However, before the intervention, 11.3% each from biological and non-biological sciences  
335 were heard of cervical cancer screening and after the intervention, it was increased to 32.1% and 43.8% in  
336 biological and non-biological sciences. 8% and 5.3% before and after 39.2% and 43.1% of biological and non-  
337 biological sciences from total respondents reported that they were heard of Pap smear test. After educational  
338 intervention, increase in awareness about cervical cancer screening was good in respondents from non-biological  
339 sciences over biological sciences (Table 3). Overall mean level of knowledge before the intervention was 1.95  
340 after the intervention was 6.93 with a mean increase of 4.98 (Table 4).

#### 341 **Awareness regarding the target population for HPV vaccination.**

342 There were eight different questions like availability of HPV vaccine, the age of vaccination, availability of HPV  
343 vaccine both for girls and boys, a vaccine for non-cervical cancers were asked before and after the educational  
344 intervention. 48.5% of total respondents before and 91.5% after education intervention were aware of HPV  
345 vaccination (Table 2). HPV vaccination category was least understood even after education intervention. 65% of  
346 study participants showed no baseline knowledge about vaccine category. Baseline knowledge about two  
347 important knowledge indicators, availability of a vaccine to protect non-cervical cancer, was 4.6% and age group  
348 for vaccination was 4.8%. After the intervention, only 18% of study participants correctly understand the right  
349 age for vaccination in girls. HPV vaccines could be given to boys, 8.8% before and after intervention 50.5%  
350 (P=0.05) could respond correctly. 18% of study respondents before and 42.4% after intervention responded  
351 correctly to the best time for HPV vaccination would be before becoming sexually active. 107 (37.8%)  
352 respondents from non-biological sciences and 78 (27.56%) respondents of biological sciences showed no baseline  
353 knowledge about the vaccine and its importance. After educational intervention, non-biological science students  
354 showed the highest increase of awareness that students belong to biological sciences (Table 3). Overall mean  
355 knowledge level before the intervention was 1.0, and after the intervention was 4.34 with a mean increase of 3.34  
356 (Table 5).

357 Table 6: Source of information about cervical cancer and Pap smear test knowledge before and after education intervention and influence of  
358 the branch of study during pre-intervention (\* Chi<sup>2</sup>= 9.54 & Cramer's V=.184 ) (\*\*Chi<sup>2</sup>=9.61 & Cramer's V= .184) at the P=0.05 significance  
359 level

---

Pre- intervention

Post- intervention

---

| Sources of information                                                    | The number responded (N) | Percent responded (%) | The number responded (N) | Percent responded (%) | Change in response after intervention (%) |
|---------------------------------------------------------------------------|--------------------------|-----------------------|--------------------------|-----------------------|-------------------------------------------|
| <b>Respondents source of information about cervical cancer knowledge*</b> | N=116                    | %=41.0                | N=253                    | %=90                  |                                           |
| Parents/ Family Members/Relatives                                         | 13                       | 4.6                   | 21                       | 7.4                   | 2.8                                       |
| Medical or nursing staff/Health Educator/Teacher                          | 32                       | 11.3                  | 134                      | 47.4                  | 36.1                                      |
| Friends/Classmates                                                        | 7                        | 2.5                   | 17                       | 6.0                   | 3.5                                       |
| Other sources                                                             | 64                       | 22.6                  | 82                       | 29.0                  | 6.4                                       |
| <b>Respondents source of information about Pap smear test**</b>           | N=84                     | %=29.7                | N=235                    | %=82.6                |                                           |
| Parents/ Family Members/Relatives                                         | 15                       | 5.3                   | 15                       | 5.3                   | 0.0                                       |
| Medical or nursing staff/Health Educator/Teacher                          | 37                       | 13.0                  | 175                      | 61.4                  | 48.4                                      |
| Friends/Classmates                                                        | 8                        | 2.8                   | 21                       | 7.4                   | 4.6                                       |
| Other sources                                                             | 24                       | 8.5                   | 24                       | 8.5                   | 0.0                                       |

360

### 361 Source of information about cervical cancer and Pap smear test

362 41% respondents said they heard about cervical cancer through some source before intervention and after  
363 educational intervention increased to 90%. Most common source of information at baseline was other sources  
364 (22.6%) including media. After educational intervention, health educator score was increased from 11.3 to 47.4%  
365 (Table 6). 29.7% of respondents who had heard about Pap smear test got their information from the medical staff,  
366 followed by other sources (mass media), relatives and friends (Table 6). After educational intervention, 82.6% of  
367 respondents were reported awareness of Pap smear and sources of Pap smear test. Health educator as the source  
368 of information before and after the educational intervention increased from 13% to 61.4%. Utilization of the Pap  
369 smear test only once among this population and only 3.5% of participants' family members', being screened (Table  
370 7).

### 371 Perceptions of cervical cancer screening and HPV vaccination

372 Perceptions of cervical cancer screening and HPV vaccination of the respondents are presented in Table 7. Before  
373 the educational intervention, 25.8% and after 46.3% of the respondents would like to receive or recommend  
374 cervical cancer screening. Similarly, 15.9% of respondents before the educational intervention, 47% of the  
375 respondents after educational intervention would like to receive or recommended for HPV vaccination. Before  
376 the educational intervention, 9.5% biological and 6.3% non-biological sciences expressed acceptance for HPV  
377 vaccination and after the intervention, acceptance was increased to 18.3% and 28.2% respectively. From total  
378 respondents, 1% of first year, 9.8% of second year, 1.4% of third year and 3.5% of fourth-year students expressed  
379 likeliness to receive HPV vaccination before intervention and after educational intervention, 10.6% (first year),  
380 16.6% (second year), 14.8% (third year) and 4.9% (fourth year & above) students agreed (Table 4).

381 Table 7: Impact of education intervention on awareness about Pap smear test was done and perceptions to receive cervical cancer screening  
382 and vaccination

|                                                                                                      | Pre-intervention         |                       | Post- intervention       |                       |                                           |
|------------------------------------------------------------------------------------------------------|--------------------------|-----------------------|--------------------------|-----------------------|-------------------------------------------|
| <b>Awareness &amp; Perception</b>                                                                    |                          |                       |                          |                       |                                           |
|                                                                                                      | Pre- intervention*       |                       | Post- intervention       |                       |                                           |
| <b>Concern/acceptability</b>                                                                         | The number responded (N) | Percent responded (%) | The number responded (N) | Percent responded (%) | Change in response after intervention (%) |
| <b>Important obstacle preventing yourself to receive or recommend screening and HPV vaccination?</b> | N=283                    | %=100.0               | N=283                    | %=100.0               |                                           |
| Do not know                                                                                          | 73                       | 25.8                  | 22                       | 7.8                   | -18.0                                     |
| No concern                                                                                           | 60                       | 21.2                  | 98                       | 34.6                  | 13.4                                      |
| Cost                                                                                                 | 23                       | 8.1                   | 59                       | 20.8                  | 12.7                                      |
| Concern about side effects                                                                           | 66                       | 23.3                  | 69                       | 24.4                  | 1.1                                       |
| Concern about efficacy                                                                               | 12                       | 4.2                   | 24                       | 8.5                   | 4.3                                       |
| Inadequate information                                                                               | 49                       | 17.3                  | 11                       | 3.9                   | -13.4                                     |
|                                                                                                      | The number responded (N) | Percent responded (%) | The number responded (N) | Percent responded (%) | Change in response after intervention (%) |
| <b>You/any of your family member ever had done Pap smear test?</b>                                   | N=283                    | %=100.0               | N=283                    | %=100.0               |                                           |
| Do not know                                                                                          | 189                      | 66.8                  | 114                      | 40.3                  | -26.5                                     |
| No                                                                                                   | 84                       | 29.7                  | 159                      | 56.2                  | 26.5                                      |
| Yes                                                                                                  | 10                       | 3.5                   | 10                       | 3.5                   | 0.0                                       |
| <b>Would you like to receive cervical cancer screening?</b>                                          | N=283                    | %=100.0               | N=283                    | %=100.0               |                                           |
| Do not know                                                                                          | 158                      | 55.8                  | 63                       | 22.3                  | -33.5                                     |
| No                                                                                                   | 52                       | 18.4                  | 89                       | 31.4                  | 13.0                                      |
| Yes                                                                                                  | 73                       | 25.8                  | 131                      | 46.3                  | 20.5                                      |
| <b>Would you like to be recommended for HPV vaccination?</b>                                         | N=283                    | %=100.0               | N=283                    | %=100.0               |                                           |
| Do not know                                                                                          | 203                      | 71.7                  | 81                       | 28.6                  | -43.1                                     |
| No                                                                                                   | 35                       | 12.4                  | 69                       | 24.4                  | 12.0                                      |
| Yes                                                                                                  | 45                       | 15.9                  | 133                      | 47.0                  | 31.1                                      |

383

384 Table 8: Concerns/acceptability to take up cervical cancer screening before and after education intervention and influence of \*Age category  
 385 at pre-intervention with  $\chi^2=15.90$  at the  $P=0.05$  significance level

386

### 387 Concerns of receiving or recommending HPV vaccination

388 Overall acceptance of HPV vaccine among the study population before 21.2% and 34.6% after educational  
 389 intervention. Before and after educational intervention concern about side effects (23.3%, 24.4%), efficacy (4.2%,  
 390 8.5%), inadequate information (17.3%, 3.9%), and cost (8%, 20.8%) respectively. Interesting inadequate  
 391 information as a complaint reduced from 17.3% to 3.9% (Table 8).

392 Table 9: Health seeking behavior of respondents before and after education intervention and influence of the branch of study at post-  
 393 intervention with  $\chi^2=31.81$  and Cramer's  $V=0.335$  at the  $P=0.05$  significance level

394

|                                                            | Pre-intervention         |                       | Post-intervention        |                       |                                           |
|------------------------------------------------------------|--------------------------|-----------------------|--------------------------|-----------------------|-------------------------------------------|
| <b>Health seeking behavior</b>                             | The number responded (N) | Percent responded (%) | The number responded (N) | Percent responded (%) | Change in response after intervention (%) |
| <b>If you have a symptom, how soon you visit a doctor?</b> | N=283                    | %=100.0               | N=283                    | %=100.0               |                                           |
| Do not know                                                | 164                      | 58.0                  | 73                       | 25.8                  | -32.2                                     |
| Within 7 days                                              | 67                       | 23.7                  | 111                      | 39.2                  | 15.5                                      |
| A couple of weeks                                          | 16                       | 5.7                   | 28                       | 9.9                   | 4.2                                       |
| A couple of months                                         | 20                       | 7.1                   | 28                       | 9.9                   | 2.8                                       |
| Maybe 6 months                                             | 8                        | 2.8                   | 8                        | 2.8                   | 0.0                                       |
| Maybe one year                                             | 4                        | 1.4                   | 7                        | 2.5                   | 1.1                                       |
| Never visit                                                | 4                        | 1.4                   | 28                       | 9.9                   | 8.5                                       |

395

396 **Health seeking behaviour of respondents before and after education intervention**

397 To understand the health-seeking behaviour, respondents were been asked if they have a symptom of cervical  
 398 cancer, how soon they visit a doctor and in response to this, 58% of respondents could not decide before  
 399 intervention and 25.8% could not understand the importance of health check even after education intervention.  
 400 1.4% of respondents before and 9.9% after intervention said, they never visit any medical help. Before  
 401 intervention, 23.7% and after intervention, 39.2% respondents reported, they will visit medical hospital within a  
 402 few days. 18.3% before and 34.9% after education intervention felt they will visit hospital from a couple of weeks  
 403 to a couple of months (Table 9).

404

405 Table 10: Preference of venue for cervical cancer screening and vaccination before and after education intervention and influence of age  
 406 category at post-intervention with  $\chi^2= 10.25$  and Cramer's  $V= 0.190$  at the  $P=0.05$  significance level

| Venue                                                      | Pre- intervention        |                       | Post- intervention       |                       | Change in response after intervention (%) |
|------------------------------------------------------------|--------------------------|-----------------------|--------------------------|-----------------------|-------------------------------------------|
|                                                            | The number responded (N) | Percent responded (%) | The number responded (N) | Percent responded (%) |                                           |
| <b>The appropriate venue for screening and vaccination</b> | N=283                    | %=100.0               | N=283                    | %=100.0               |                                           |
| Do not know                                                | 150                      | 53.0                  | 85                       | 30.0                  | -23.0                                     |
| Local Community health center/clinic                       | 39                       | 13.8                  | 80                       | 28.3                  | 14.5                                      |
| Women and children's hospital                              | 41                       | 14.5                  | 56                       | 19.8                  | 5.3                                       |
| General hospital                                           | 26                       | 9.2                   | 26                       | 9.2                   | 0.0                                       |

  

| Factors                  | Cervical cancer screening |            |                   |            | Cervical cancer vaccination |            |                   |            |
|--------------------------|---------------------------|------------|-------------------|------------|-----------------------------|------------|-------------------|------------|
|                          | Pre-intervention          |            | Post-intervention |            | Pre-intervention            |            | Post-intervention |            |
|                          | Chi <sup>2</sup>          | Cramer's V | Chi <sup>2</sup>  | Cramer's V | Chi <sup>2</sup>            | Cramer's V | Chi <sup>2</sup>  | Cramer's V |
| Age category             | 5.984                     | .145       | 9.456             | .183       | 10.19                       | .190       | 6.66              | .154       |
| Year of study            | 16.45                     | .171       | 36.94             | .255       |                             |            | 32.21             | .239       |
| Branch of study          |                           |            | 11.05             | .198       | 10.02                       | .188       |                   |            |
| Religion                 |                           |            | 7.64              | .164       |                             |            | 7.02              | .158       |
| Father's education level |                           |            | 14.88             | .162       |                             |            | 11.01             | .140       |
| Mother's education level | 7.29                      | .113       | 12.92             | .151       |                             |            | 19.24             | .184       |
| Father's occupation      | 19.18                     | .184       | 13.86             | .157       | 11.93                       | .145       |                   |            |
| Family Income            |                           |            |                   |            |                             |            | 16.78             | .172       |
| SIB combination          |                           |            |                   |            | 8.80                        | .176       |                   |            |
| School                   |                           |            | 27                | 9.5        | 36                          | 12.7       |                   | 3.2        |

407

408 **Preference of venue for cervical cancer screening and vaccination before and after education intervention**

409 Before the educational intervention, 53% and after the intervention, 30% of the respondents could not decide the  
 410 preference of venue for the screening and vaccination. Before the intervention, women and children's hospital  
 411 was the most preferred venue (14.5%) and after the educational intervention, local community health centre/local  
 412 clinic was the preferred venue (28.3%). General hospital as venue preferred by 9.2% respondents before and after  
 413 intervention (Table 10).

414 Table 11: Factors influencing perceptions to receive cervical cancer screening and vaccination before and after educational intervention at  
 415  $P=0.05$

416

417



418 **Overall knowledge about cervical cancer and associated factors**

419 **Chi<sup>2</sup> test of independence and McNemar's test**

| Variables checked for association                                             | Age  |      | BOS   |      | YOS   | F. Ed. | M. Ed. | FS    |
|-------------------------------------------------------------------------------|------|------|-------|------|-------|--------|--------|-------|
|                                                                               | Pre  | Post | Pre   | Post | Post  | Pre    | Pre    | Post  |
| <b>General awareness and symptoms</b>                                         |      |      |       |      |       |        |        |       |
| Ever heard of cervical cancer                                                 |      | 7.9  | 7.845 | 9.3  | 14.3  |        |        | 7.48  |
| Cervical cancer is a curable disease?                                         | 8.75 |      | 7.49  |      | 10.3  |        |        |       |
| Do you know the causes of cervical cancer are?                                |      |      | 11.02 |      | 34.9  |        |        | 6.34  |
| Persistent vaginal discharge that smells unpleasant.                          | 5.61 |      | 5.99  |      | 29.12 |        |        | 6.54  |
| Whether vaginal bleeding between periods could be a sign?                     |      |      | 4.75  |      | 16.7  |        |        |       |
| Do you think menorrhagia is a symptom for cervical cancer?                    |      |      | 3.99  |      | 17.0  |        | 13.55  |       |
| Vaginal bleeding after the menopause could be a sign.                         | 4.49 | 4.0  |       | 5.37 |       |        | 15.02  | 17.37 |
| Persistent pelvic pain could be a sign.                                       |      |      | 4.85  |      | 14.74 |        | 6.85   | 10.87 |
| Discomfort or pain during sex could be a sign.                                |      |      | 4.05  |      |       | 7.18   | 7.41   | 9.0   |
| Vaginal bleeding during or after sex could be a sign.                         | 5.6  |      | 4.65  |      | 10.8  |        |        | 7.0   |
| <b>Knowledge about risk factors</b>                                           |      |      |       |      |       |        |        |       |
| Whether poor hygiene is a risk factor?                                        | 5.92 | 4.87 |       |      |       | 8.97   |        |       |
| Whether coitus at an early age is a risk factor?                              |      |      |       | 5.93 |       |        |        | 5.73  |
| Whether multiple sex partners is a risk factor?                               |      |      | 12.74 | 4.16 | 12.0  |        | 7.87   | 4.58  |
| Do you think unprotected intercourse could be a risk factor?                  |      |      |       |      | 19.5  | 8.11   | 8.11   | 3.8   |
| Do you think consuming contraceptive pills could be a risk factor?            |      |      |       |      | 9.48  |        | 6.64   | 3.9   |
| No knowledge of cervical cancer is a risk factor?                             |      | 4.34 | 6.68  |      | 15.28 | 9.69   | 16.74  | 7.35  |
| Swelling of the cervix is a risk factor?                                      |      | 3.99 | 5.97  |      |       | 9.84   |        | 7.55  |
| Whether high parity is a risk factor?                                         |      | 9.59 |       |      | 28.2  |        |        | 7.9   |
| Do you think smoking could be a risk factor for c. cancer?                    |      |      |       |      | 30.5  |        |        | 4.34  |
| <b>Knowledge about Human Papilloma Virus</b>                                  |      |      |       |      |       |        |        |       |
| Causative organism of cervical cancer.                                        |      |      | 16.7  | 11.8 | 34.45 |        |        | 6.45  |
| Human papillomavirus (HPV) and its relation to cc?                            | 4.38 |      |       |      | 28.62 | 6.9    | 6.1    |       |
| HPV can infect women and can cause cervical cancer.                           |      | 6.0  | 7.4   |      | 31.5  |        |        |       |
| HPV is a sexually transmitted infection.                                      |      |      | 4.7   | 5.74 |       | 6.0    |        |       |
| HPV infections are usually obvious and most infections resolve by themselves. | 9.34 | 4.1  | 5.0   |      |       |        |        |       |
| HPV cannot infect men.                                                        |      |      |       | 9.5  | 13.4  |        |        |       |
| HPV infections can cause genital warts.                                       | 5.94 | 8.67 | 6.5   |      | 20.3  | 9.43   |        |       |
| HPV infections can cause oral/pharyngeal cancer.                              | 5.46 |      |       |      | 15.26 |        |        |       |
| HPV infections can cause anal cancer.                                         |      | 4.42 |       | 13.1 | 16.16 |        |        | 5.7   |
| <b>Knowledge about screening</b>                                              |      |      |       |      |       |        |        |       |
| Ever heard of screening.                                                      |      | 4.69 |       |      | 22.8  |        | 11.9   |       |

420 To understand the influence of various socio-demographic factors on perception of cervical cancer screening and

421 HPV vaccination, a Chi<sup>2</sup> test of independence was carried out. Age and father's occupation had a significant impact

422 on both screening and vaccination before educational intervention. The post-intervention perception was under

423 the influence of age, year of study, religion, parents' education level, and family income at P=0.05 (Table 11).

424 Bivariate analysis showed six socio-demographic characteristics were found to be significantly associated with

425 knowledge levels about cervical cancer: age, educational level, branch of study, fathers and mother's education

426 levels, and family size (Table 12).

427 Table 12: Chi-square analysis of independence of various socio-demographic factors and dependable variables about cervical cancer

428 symptoms, Risk factors, HPV, screening and vaccination of respondents during pre and post educational intervention at P=0.05 significance.

429 BOS= Branch of study; YOS=Year of study; FE=Father's education level; ME= Mother's education level; FS=Family size.

430

|                                                         |      |      |       |
|---------------------------------------------------------|------|------|-------|
| Have you ever heard of the Pap smear test?              | 16.8 | 6.8  | 20.76 |
| Pap smear test is used for.                             |      | 4.1  | 8.84  |
| How often a woman should undergo screening.             |      | 5.4  | 19.33 |
| Do you think all women should undergo screening for cc? |      | 5.43 | 27.16 |

**Knowledge about vaccination**

|                                                            |     |      |       |      |
|------------------------------------------------------------|-----|------|-------|------|
| HPV vaccine exists that protects against cervical cancer.  | 7.1 | 10.8 | 29.4  |      |
| A vaccine for HPV is not available to men.                 |     |      |       | 7.35 |
| Can HPV vaccines be given to boys?                         |     |      | 10.36 |      |
| HPV vaccine exists that can protect against genital warts. |     |      | 14.1  |      |
| HPV vaccines available against non-cervical cancers.       |     |      | 10.38 |      |
| Most appropriate stage for HPV vaccination.                |     |      | 18.11 |      |

431

432

433

434

435

436

437 Table 13: McNemar test of cervical cancer awareness about symptoms, risk factors, HPV, screening and vaccination of respondents at P=0.000  
438 significance level.

| Domains compared                                                                        | N= 283<br>Chi <sup>2</sup> value |
|-----------------------------------------------------------------------------------------|----------------------------------|
| <b>General awareness</b>                                                                |                                  |
| Ever heard of cervical cancer                                                           | 131.177                          |
| Cervical cancer is a curable disease?                                                   | 84.198                           |
| Do you know the causes of cervical cancer are?                                          | 190.046                          |
| Persistent vaginal discharge that smells unpleasant.                                    | 116.834                          |
| Whether vaginal bleeding between periods could be a sign?                               | 114.369                          |
| Do you think menorrhagia is a symptom for cervical cancer?                              | 139.752                          |
| Vaginal bleeding after the menopause could be a sign.                                   | 119.858                          |
| Persistent pelvic pain could be a sign.                                                 | 133.536                          |
| Discomfort or pain during sex could be a sign.                                          | 86.094                           |
| Vaginal bleeding during or after sex could be a sign.                                   | 126.130                          |
| <b>Knowledge about risk factors</b>                                                     |                                  |
| Whether poor hygiene is a risk factor?                                                  | 71.022                           |
| Whether coitus at an early age is a risk factor?                                        | 88.408                           |
| Whether multiple sex partners is a risk factor?                                         | 101.828                          |
| Do you think unprotected intercourse could be a risk factor for cervical cancer?        | 104.599                          |
| Do you think consuming contraceptive pills could be a risk factor for cervical cancer?  | 115.563                          |
| No knowledge of cervical cancer is a risk factor?                                       | 63.780                           |
| Swelling of the cervix is a risk factor?                                                | 75.622                           |
| Whether high parity is a risk factor?                                                   | 64.545                           |
| Do you think smoking could be a risk factor for cervical cancer?                        | 118.791                          |
| <b>Knowledge about Human Papilloma Virus</b>                                            |                                  |
| Causative organism of cervical cancer                                                   | 165.443                          |
| Are you aware what is Human papillomavirus (HPV) and its relation with cervical cancer? | 165.443                          |
| HPV can infect women and can cause cervical cancer                                      | 127.592                          |
| HPV is a sexually transmitted infection                                                 | 131.579                          |
| HPV infections are usually obvious and most infections resolve by themselves            | 71.280                           |
| HPV cannot infect men                                                                   | 44.000                           |
| HPV infections can cause genital warts                                                  | 95.291                           |
| HPV infections can cause oral/pharyngeal cancer                                         | 82.565                           |
| HPV infections can cause anal cancer                                                    | 12.645                           |
| <b>Knowledge about screening</b>                                                        |                                  |
| Ever heard of screening                                                                 | 133.136                          |
| When should women start screening?                                                      | 84.615                           |
| Have you ever heard of Pap smear test                                                   | 141.316                          |
| Pap smear test is used for.                                                             | 103.705                          |
| Pap smear test can pick up cell changes that may go on to become cervical cancer.       | 154.152                          |
| How often should women have cervical cancer screening?                                  | 111.455                          |
| <b>Knowledge about vaccination</b>                                                      |                                  |
| HPV vaccine exists that protects against cervical cancer.                               | 154.230                          |
| A vaccine for HPV is not available to men                                               | 40.449                           |
| Can HPV vaccines be given to boys?                                                      | 96.401                           |
| To which age group HPV vaccine should be given                                          | 21.966                           |

|                                                                  |        |
|------------------------------------------------------------------|--------|
| HPV vaccine exists that can protect against genital warts        | 88.408 |
| HPV vaccines available that protect against non-cervical cancers | 62.500 |
| Most appropriate stage for HPV vaccination                       | 63.366 |

---

439

440 Age, branch of study, father's and mother's education level had strong association on awareness before  
441 intervention (Table 12) and post-intervention knowledge gain was under the strong influence of year of study and  
442 other influencing factors were age, branch of study, family size. Age, educational level and branch of the study  
443 were found to have a significant association with level of knowledge about cervical cancer before and after  
444 intervention (Table 12). McNemar test of cervical cancer awareness was carried out and change of overall score  
445 of symptoms, risk factors, HPV, screening and vaccination of respondents was at P=0.000 significance level  
446 (Table13). Using the sum of all knowledge items, we determined that a total of 33.9% (P=0.001) of the participants  
447 had sufficient (very good) knowledge about cervical cancer after the educational intervention.

#### 448 **Multi-variate statistical analysis**

449 A multivariate analysis was done using multiple logistic regression models to investigate the predictors of  
450 awareness of symptoms, risk factors, HPV, screening, and vaccination in the study population. The result of the  
451 analysis showed that before the educational intervention, the branch of study, and after educational intervention  
452 year of study significantly predict levels of awareness of cervical cancer.

#### 453 **Discussion**

454 The main objective of this study was to assess knowledge levels at baseline and after education intervention about  
455 cervical cancer symptoms, risk factors, HPV and its relation to cervical cancer, screening, and vaccination, and  
456 factors influence the knowledge levels, this is the first kind of study carried out using questionnaire validated  
457 through pilot study to understand the impact of knowledge intervention on young 17 to 30 years aged college  
458 attending women of University of Gondar, Northwest Ethiopia region. To prevent and control any disease,  
459 knowledge is prerequisite and attitude plays a crucial role and our study showed very poor knowledge levels,  
460 similar observations from various regions of Ethiopia [4, 5, 28] and different African countries [39-45]. The  
461 baseline awareness about knowledge, symptoms, risk factors, HPV, screening and vaccination was low before  
462 intervention (18.27%) and is very lower compared to different studies from Nigeria (23.4%), Addis Ababa (34.2  
463 %), Ghana (37.0%) and, South Ethiopia (46.3%) and 51%, Dessie town [44-48]. Developing countries have poor  
464 knowledge [49-52] compared to developed countries [53, 54]. 41.0% of our study participants heard about cervical  
465 cancer before intervention was similar with 40.8% in Nigeria [55]. However lower than reports from different  
466 regions of Ethiopia, 53.11% in Mizan Tepi, 76.8% in Hawassa, 78.7% in Gondar town [2, 29, 56] and in some

467 African countries like Republic of Congo (81.9%), in Botswana (77%) and 68.4% in Southern Ghana [57-59].  
468 Students of fourth year and above showed baseline score of 11 compared to first-year students (6) irrespective of  
469 the branch and can be compared with earlier study on Hawassa university students [2]. Studies show that, levels  
470 of education was significantly associated with knowledge about cervical cancer [48, 57, 60].

471 The baseline knowledge of biological sciences was 10 and non-biological sciences participants showed 7 and  
472 background of biological sciences might influence baseline knowledge and similar observation was reported that  
473 knowledge of medical students was better over public health students [2]. 49% of our participants' baseline level  
474 on various symptoms associated with cervical cancer such as vaginal bleeding between periods (15.2%), painful  
475 coitus (22.6%) and bleeding after intercourse (17.3%) were reported and these findings are lower than studies  
476 carried out [61-64]. Before the educational intervention, study participants showed poor knowledge about cervical  
477 cancer risk factors. About 35.6 % of student respondents had no idea about risk factors associated with the disease  
478 before educational intervention which was very lower than 67.9% reported for Hawassa University College  
479 students [2]. 30.1% study respondents identified one or more correct risk factors before education intervention  
480 which was very much matched with study carried out at Gondar, 31% [5] and was much lower than the similar  
481 study done in South Africa, 64.0% [65]. 33% of our students identified, multiple sex partners, and similar response  
482 observed in the previous reports [66-69], however, response is higher than the study conducted in South Africa  
483 (26%), however, is lower than 49.7% awareness showed by Hawassa university medical students [2] and 53%  
484 awareness by university students of Bhutan [70] and other studies [63, 71, 72]. The difference could be due to  
485 the inaccessibility of the cervical cancer screening service, as well as less attention was given to reproductive  
486 health in Ethiopia. A study from Malaysia could not identify any of the cervical cancer risk factors [69].

487 Baseline knowledge about prolonged use of contraceptive pills as a risk factor was low in our study participants  
488 and only 17.3% study respondents identified and a similar observation was reported [73]. Only 19.4% of our study  
489 respondents identified smoking is a risk factor which is lower (22.3%) than a study in Gabon [74] but higher than  
490 a study in Ghana, only 1% participants identified [75]. 28.6% study respondents identified early coitus could be  
491 a risk factor and is higher than 13%, reported in a study [67]. 16.6% of the participants were aware HPV as the  
492 causative organism and is better over 9% reported in Southern Ethiopia [76] and 8% in Gabon [74] and [60].  
493 However, is much lower than similar studies carried out in Northern Ethiopia [5] and other regions of Africa [77,  
494 78]. Only 15.2% study respondents identified, STI nature of HPV before educational intervention and was  
495 matching with a study [79], however, was low than other reports, 31.5% [80] and 41% [67].

496 Low levels of knowledge on HPV was reported in a study US [81] and in another report, 78.5% of the college  
497 women to have heard of HPV in the US [82], UK, 63% [83]. Several studies from different countries reported that  
498 overall, the general public has low-level of awareness about HPV infection [84]. Only 9.5% of study respondents  
499 identified, HPV can cause anal cancers before the educational intervention and is less than similar earlier reports  
500 [85-90]. 13.4% of our participants were aware of the preventable nature of cervical cancer before education  
501 intervention and is matching with similar studies from semi-urban India, 12.2% and 11% [67, 91] and is lower  
502 than similar studies reported in 17.5%, [92], 30.5% in Burkina Faso [93], Addis Ababa, 50.6% [34], 51.5%  
503 [94](Awodele et al., 2011), South Africa, 57.0% [65], Southern Ethiopia, 57.6% [76], Northern part of Ethiopia,  
504 63.9% [5]. Base level knowledge of 19.7% of study respondents were aware of screening, higher than 11% [67]  
505 and Malaysian population [69] and lower than 33.97% in Mizan Tepi, Ethiopia [56] and 41% [95]. A study in  
506 Addis Ababa revealed, that the vast majority of nurses and midwives had poor knowledge on aetiology and risk  
507 factors and never heard of any screening methods other than the Pap smear [12]. Only 3% of utilization of Pap  
508 smear test once among our study participants relatives and is matching with similar studies, only 5% respondents  
509 underwent Pap test [61, 96]. The low levels of awareness could be due to lack of nationwide screening policy in  
510 Ethiopia. This could be due to low levels of knowledge on cervical cancer and is supported by earlier report that,  
511 cervical cancer knowledge levels determine the rate of screening uptake [41]. This highlights the need of spread  
512 about awareness and health education about cervical cancer is critical as primary care taken to scale up the  
513 screening in Ethiopia. According to FMOH, 2016 [27], cervical cancer screening and prevention strategies are  
514 initiated by the Ethiopian government.

515 Before intervention, 39.5% of total respondents were not aware of HPV vaccination and 65% of study participants  
516 showed no baseline knowledge about vaccine category. 4.6% of respondents know that vaccine is available to  
517 protect against non-cervical cancer and 4.9% of respondents only aware at what age vaccine should be given,  
518 8.8% of students answered HPV vaccines could be given to boys. Similarly, 15.8% of participants reported that  
519 vaccination could be a preventive method [76]. Most countries in sub-Saharan Africa, including Ethiopia, did not  
520 include routine HPV vaccination in the national prevention strategy for cervical cancer and other HPV-related  
521 diseases [28]. Despite vaccination, not being implemented in Ethiopia, the awareness and knowledge of  
522 participants would help as an effective primary prevention strategy [97-99]. The Ethiopian government has also  
523 recently introduced HPV vaccination demonstration project and yet to available as a national program [34]. 41%  
524 respondents said they heard about cervical cancer through some source. 29.7% of respondents from the medical  
525 staff, followed by 22.6% other sources including relatives and friends and 11.3% teachers. Similar observations

526 reported by various studies, 55.5% teachers as the source, 30.5% mass media and 22.9% health worker as their  
527 source of information for cervical cancer and its screening [2, 100]. 29.7% of respondents who had heard about  
528 Pap smear test got their information from the medical staff, followed by other sources, relatives, and friends. This  
529 is higher than a similar type of studies carried in other places like Nigeria [44] 27%, Gondar town, 13.7% [5], not  
530 aware of the Pap smear test [101-104]. But lower than South Africa where 49.0% of the respondents heard of the  
531 test [65]. The low participation of health workers indicate that health workers are not thoroughly trained and media  
532 is not able to reach both rural and urban parts of the country equally. Women from urban areas were obtained  
533 information through various sources including, internet and mass media [105]. In contrast, a report on Congo  
534 women showed that conversation with other people was the basic source of cervical cancer awareness than through  
535 media [57]. Role of audio-visual means of spreading awareness had a mixed impact in African countries [106],  
536 remains a potentially important method of health promotion in rural low-educated communities.

537 Before educational intervention, 25.8% of the respondents would like to receive and recommend cervical cancer  
538 screening and similarly, 15.9% of respondents would like to receive and/or recommend HPV vaccination and is  
539 little higher than Southern Ethiopia, 14.2% [76], however, is very less than Ruvuma 55.7%, [75], Mizan Tepi  
540 University students, 61.24% [56]. An important observation in our study participants consistent with studies  
541 carried out in other African countries is, willingness for the cervical cancer screening was found poor even after  
542 having knowledge of the disease and its importance [56] and similar findings in other parts of Ethiopia [29, 77,  
543 107]. This could be due to lower attention to female health in Ethiopia. Overall acceptance of HPV vaccine among  
544 the study population was 21.2%. The main concerns were about side effects (23.3%), efficacy (4.2%), inadequate  
545 information (17.3%), and cost (8%). Similar reports, the cost was a major concern [108, 109] and inadequate  
546 information [110] was reported. There was a low acceptance to seek the medical help in our study participants  
547 and 39.2% respondents reported, they will visit the medical hospital within a few days. This was less than 55.3%,  
548 Mizan Tepi [2], Addis Ababa [100], 1.4% of respondents said they never visit any medical help. This low  
549 acceptance to seek medical help might be due to psychological and socioeconomic reasons.

550 Before the educational intervention, the branch of study, and after educational intervention year of study  
551 significantly predict the level of awareness of cervical cancer. Similar observations reported [4] and reports  
552 suggest the income level also effect knowledge on cervical cancer, women with high-income level have more  
553 knowledge than women with low income. However other socio-demographic factors were not found to be  
554 statistically associated with knowledge levels [76] and not consistent with a study on Gondar community [29].  
555 After educational intervention, an increase from 20.1% to 91.2% of study participants heard about the any of the

556 screening methods, similarly an increase from 29.7% to 82.3% participants said they know Pap test as a screening  
557 method for early detection of cervical cancer. In our study population, baseline knowledge was low among all  
558 groups and similar observations in other studies [111], and low even in healthcare workers and physicians [85]  
559 and medium to low in teachers [66]. This indicates significant knowledge gaps in different populations globally  
560 and gaps are common [112].

561 Baseline knowledge of HPV was high in biological sciences and it could be the positive influence of the branch  
562 of study and it can be comparable to similar observation reported in teaching population [113]. In our study, after  
563 the educational intervention, the non-biological students' knowledge levels improved over biological sciences. A  
564 similar finding observed in a study where knowledge level improved in health workers and was similar to those  
565 of physicians [85] after intervention. Our study participants were mostly from rural areas and deprived of mass  
566 media and this could be one of the reasons for poor baseline knowledge levels. Similar observation reported [114].  
567 A brief, structured presentation increased cervical cancer awareness knowledge among all groups and is consistent  
568 with previous studies [115-117]. On average, knowledge scores significantly improved from 8 to 26 after the  
569 presentation (maximum possible score 42;  $P < 0.001$ ), irrespective of region, year of study, branch of study, and  
570 age. Recent years several studies reported a significant increase in cervical cancer knowledge in women after  
571 educational intervention [118-120].

572 Before education intervention, 41.0% of women reported that they had heard about cervical cancer and after  
573 education intervention 89.4% aware of cervical cancer. 13.4% of our participants were well aware of the  
574 preventable nature of cervical cancer before education intervention. Similarly reported that cervical cancer can  
575 be cured if it is diagnosed at an early stage [73]. After educational intervention, it increased to 50% and similar to  
576 a study [72], however, is lower than 84.2% observed in another study [92]. Only 50% awareness after intervention  
577 highlights the need and importance of education on cervical cancer, a similar observation reported [111]. Baseline  
578 knowledge about the causes of cervical cancer was 8.1% and after education intervention, awareness increased to  
579 76.7% and similarly, before the intervention, 25.1% study respondents identified persistent vaginal discharge  
580 could be a symptom and increased to 74.2%. Overall mean level knowledge about the symptoms of cervical cancer  
581 after education intervention was increased from 1.74 to 6.81 with a mean increase of 5.07. After educational  
582 intervention, 92.6% of our students could identify at least one risk factor and knowledge levels on risk factors  
583 improved [67, 92, 121]. Before the intervention, 15.2% students felt high parity could be a risk factor and after  
584 the educational intervention, 48.4% could agree, high parity could be a risk factor. And in a study, 44% responded  
585 high parity as a risk factor [122]. Similar reports on parity in previous studies in Africa show high parity as a risk

586 factor was underreported in sub-Saharan Africa [73], no report on parity [123]. In our study, most of the students  
587 had experience of high parity in their families and experienced self-serving bias and similar observations in other  
588 parts of the world [124-126]. Mean baseline awareness about the risk factors was 2.71 and after intervention an  
589 overall increase of 6.7. After the educational intervention, awareness about STD nature of HPV infections  
590 increased from 15.2% to 68.6% and similarly awareness about HPV as cervical cancer causative organism  
591 increased from baseline level 16.6% to 78.4%. HPV can cause anal cancers was the least correctly answered  
592 before (9.5%) and after (20.8%) the educational intervention. Overall mean knowledge level before the  
593 intervention was 1.37, and after the intervention was 5.61 with an increase of 4.24.

594 After the intervention, an increase from 19.7% to 69.32% in study respondents about cervical screening. Similarly  
595 in other studies, knowledge levels about symptoms, HPV, preventive methods improved after educational  
596 intervention [92]. 13.3% respondents before and 82.3% after intervention reported that they were heard of Pap  
597 smear test and similar observations earlier reported [127-129]. Pap smear test can pick cell changes knowledge  
598 levels increased from 5.7% to 62.2% in study participants after the educational intervention and educational  
599 intervention improved knowledge about HPV and cervical cancer screening. Similar observations reported in  
600 earlier studies [130-132]. The overall mean level of knowledge before the intervention was 1.95 after the  
601 intervention was 6.93 with a mean increase of 4.98.

602 48.5% of total respondents before and 91.5% after the educational intervention were aware of HPV vaccination.  
603 There is a wide global variation on cervical cancer awareness and HPV vaccination acceptability is reported in  
604 several reports [133-135]. In our study participants, HPV vaccination was the least improved category even after  
605 education intervention. The global concept of HPV vaccine is relatively new, may face challenges for general  
606 public acceptance. In our study, baseline knowledge was least in HPV vaccination and 65% of study participants  
607 not aware about HPV vaccination. But it is differing to the earlier reports, study participants showed poor  
608 knowledge on risk factors [67, 136]. After educational intervention, knowledge levels improved and vaccine  
609 acceptability increased from 15.9% to 47%. However, higher HPV vaccine acceptability reported in other studies,  
610 70% [136], 80% [133], from 80% to 89% [138], 73% to 82% [134], high levels [139] and positive impact of  
611 educational intervention on HPV vaccine acceptance. [140-143].

612 After the intervention, only 18% of study participants correctly understand the right age for vaccination in girls.  
613 HPV vaccines could be given to boys, was increased from baseline knowledge of 8.8% to 50.5% (P=0.05) after  
614 the educational intervention. 18% of study respondents before and 42.4% after intervention responded correctly



615 the best time for HPV vaccination would be before becoming sexually active. Similar observations in other  
616 studies, [144], increase incorrect response to 72.5% [138]. HPV vaccination overall mean knowledge level before  
617 the intervention was 1.0, and after the intervention was 4.34 with a mean increase of 3.34. Health educator as the  
618 source of information about Pap test before and after the educational intervention increased from 13% to 61.4%.  
619 This is differing from earlier reports on Nigeria where friends were the most important source before and after  
620 intervention [145, 146]. Friends and relatives were important source of information about cervical cancer and was  
621 corroborated by another study in Lagos which had similar findings [146]. After the educational intervention,  
622 screening acceptance levels increased from 25.8% and after 46.3% and similar increase to receive or recommend  
623 HPV vaccination from 15.9% to 47% in our study participants. Overall acceptance of HPV vaccine among the  
624 study population before 21.2% and 34.6% after educational intervention. The low increase in HPV vaccination  
625 awareness supported by other studies, inadequate knowledge of vaccine reported even in physicians, medical  
626 students, and other healthcare workers [85]. In the African continent, secondary prevention (54.6%) emphasized  
627 over primary prevention and vaccination was 23.4% [147]. Studies show after the educational intervention,  
628 knowledge on vaccination was low [113] but acceptability was high [113, 148].

629 Before and after educational intervention concern about side effects (23.3%, 24.4%), efficacy (4.2%, 8.5%),  
630 inadequate information (17.3%, 3.9%), and cost (8%, 20.8%) respectively. Interesting inadequate information as  
631 a complaint reduced from 17.3% to 3.9%. Similar reports on concern about effectiveness and side effects of the  
632 HPV vaccine [149]. Our study respondents' health-seeking behaviour is not fully positive and 1.4% of respondents  
633 before and 9.9% after intervention said, they never visit any medical help and 25.8% could not even understand  
634 the importance of health check-up. However, there was an increase from 23.7% and 39.2% of respondents  
635 reported, they will visit medical hospital within a few days. Other similar reports show after educational  
636 intervention, positive attitude to uptake screening and vaccination [115, 129, 150-159].

637 Bivariate analysis showed age, branch of study, father's and mother's education level had strong association on  
638 awareness before intervention and post-intervention knowledge gain was under the strong influence of year of  
639 study and other influencing factors were age, branch of study, family size. A similar studies showed a significant  
640 impact of level of education, income [160] with awareness and knowledge on risk factors and vaccination [161].  
641 Various studies show that independent variables like age, branch of study, level of education, parents' education  
642 and occupation are good predictors of good knowledge levels of cervical cancer. Age, educational level and branch  
643 of the study were found to have a significant association with the level of knowledge about cervical cancer before  
644 and after the intervention. The similar report showed science students had better knowledge of HPV over students,

645 not from a science background [67]. The impact of the educational intervention and an increase in the awareness  
646 about cervical cancer highlights knowledge dissemination continues to be an important tool in public health  
647 primary prevention. There is an urgent necessity to promote knowledge on risk factors of female cancers should  
648 reach all women, as well as men, and provide health education and community-based interventions. Such efforts  
649 could promote a positive attitude towards treatment options, outcomes, and survivorship in female cancers and  
650 improve practices could help overcome poor awareness.

## 651 **Conclusion**

652 The overall baseline knowledge levels were very low and mean level of awareness on various broad issues  
653 (categories) of cervical cancer was 8.77. After education intervention knowledge levels improved to 30.39.  
654 Baseline knowledge on risk factors, screening and symptoms were better over HPV and vaccination. However,  
655 after the intervention, knowledge levels improved in all domains with low improvement about vaccination. Only  
656 10 (3.5%) participants' family members were ever screened for cervical cancer, although the 46.3% of them were  
657 willing to undergo screening, the important obstacle cost. Majority of the respondents did not hear the availability  
658 of vaccine and its primary preventive role in improving the risk of HPV infections. The result of this study revealed  
659 that only 33.9% of women had sufficient knowledge of cervical cancer after education intervention. This study  
660 also showed that a small percentage of study participants (9.9%) had an unfavorable attitude to seek medical help  
661 when they may any symptom of cervical cancer. The study also revealed that branch of study, year of study were  
662 significantly associated with knowledge levels of the students. Based on the findings of this study, education  
663 intervention is an effective method to improve knowledge levels on cervical cancer and students can be trained to  
664 disseminate the knowledge in society and help in spreading the positive attitude towards screening and  
665 vaccination. Based on this, we recommend the government should take measures to initiate health education  
666 training on cervical cancer at university levels and make educational institutions become important stakeholders  
667 to disseminate cervical cancer awareness and positive attitude in society.

## 668 **Acknowledgment**

669 We thank all women students of Twedrows and Maraki campuses of the University of Gondar who took part in  
670 the survey. We also thank Institute of Biotechnology, University of Gondar, Gondar, Ethiopia for invaluable  
671 suggestions and support.

## 672 **Author Contributions**

673 Conceptualization: NB, IM. Data collection tool (English): NB, IM & Data collection tool (Amharic): TM.  
674 Performed the experiments: IM, TM. Resources and supervision: NB. Analyzed the data: IM, NB, TM. Wrote  
675 original draft: IM. Editing & finalizing the original draft: NB, TM & IM.

#### 676 **Conflict of Interest**

677 We declare no conflict of interest

#### 678 **References**

- 679 1. GLOBOCAN 2018: The Lancet: [www.thelancet.com](http://www.thelancet.com) 392, 2018.  
680 [https://www.thelancet.com/journals/lancet/article/PIIS0140-6736\(18\)32252-9/fulltext](https://www.thelancet.com/journals/lancet/article/PIIS0140-6736(18)32252-9/fulltext).
- 681 2. Tsegaye S, Daniel M, Teklemariam G. Knowledge and attitude towards cervical cancer screening and  
682 associated factors among female Hawassa university college of medicine and health sciences students.  
683 MOJ Public Health. 2018; 7(3):151–158. DOI: [10.15406/mojph.2018.07.00221](https://doi.org/10.15406/mojph.2018.07.00221)
- 684 3. Chinula, L, Moses A, Gopal S. HIV- associated malignancies in sub- Saharan Africa: progress,  
685 challenges, and opportunities. Curr Opin HIV AIDS. 2017; 12: 89–95. PMID: 27607593 PMCID:  
686 PMC5241291 DOI: 0.1097/COH.0000000000000329
- 687 4. Mesfin TS, Hailu FD, Dagne MT, Roza A, Yonas TM, Amare W. Level of Knowledge and Associated  
688 Factor toward Cervical Cancer among Women Age (21-64) Years Visiting Health Facilities in Gulele  
689 Sub-city Addis Ababa Ethiopia. J Pancreas, 2017; 25; 18(1):44-48.
- 690 5. Getahun G, Mazengia F, Abuhay M, Birhanu Z. Comprehensive knowledge about cervical cancer is low  
691 among women in Northwest Ethiopia. BMC Cancer; 2013; 13:2 [http://www.biomedcentral.com/1471-](http://www.biomedcentral.com/1471-2407/13/2)  
692 [2407/13/2](https://doi.org/10.1186/1471-2407-13-2). <https://doi.org/10.1186/1471-2407-13-2> PMID: 23282173.
- 693 6. Iliyasu Z, Abubakar IS, Aliyu MH, et al. Cervical cancer risk perception and predictors of human  
694 papillomavirus vaccine acceptance among female university students in northern Nigeria. J Obstet  
695 Gynaecol. 2010; 30(8):857–862. Doi: <https://doi.org/10.3109/01443615.2010.511724>
- 696 7. Jemal A, Freddie B, Melissa MC, Jacques F, Elizabeth W, David F. Global Cancer Statistics. CA Cancer  
697 K Clin 2011; 61:69–90. <https://doi.org/10.3322/caac.20107>
- 698 8. Ellerbrock, TV, Chiasson MA, Bush TJ, Sun XW, Sawo D, Brudney K, et al. Incidence of cervical  
699 squamous intraepithelial lesions in HIV- infected women. JAMA. 2000; 283:1031–1037. PMID:  
700 10697063

- 701 9. World Health Organization (WHO). Human Papillomavirus and Related Cancers: Summary Report  
702 Update. 2010. <https://www.unav.edu/documents/16089811/16216616/HPVReport2010.pdf>
- 703 10. GLOBOCAN, 2008. <https://www.iarc.fr/media-centre-iarc-news-29/>
- 704 11. Sreejata R, Sukanta M. Current Status of Knowledge, Attitude and Practice (KAP) and Screening for  
705 Cervical Cancer in Countries at Different Levels of Development. *Asian Pacific Journal of Cancer*  
706 *Prevention*, 2012; 12: 4221-27.
- 707 12. Kress CM, Lisa S, Ashali OS, Dawit D, Henry MB, Jennifer G. Knowledge, attitudes, and practices  
708 regarding cervical cancer and screening among Ethiopian health care workers. *International Journal of*  
709 *Women's Health*. 2015;7 765–772. doi: 10.2147/IJWH.S85138
- 710 13. Ferlay J, Bray F, Pisani P, Parkin DM. GLOBOCAN 2000: cancer incidence, mortality and prevalence  
711 worldwide, version 1.0. IARC Cancerbase no. 5. Lyon, France: IARC Press, 2001.  
712 <https://doi.org/10.1002/ijc.25516>.
- 713 14. Parkin DM, Pisani P, Ferlay J. Estimates of the worldwide incidence of eighteen major cancers in 1985.  
714 *Int J Cancer* 1993; 54(4):594–606. PMID: 8514451
- 715 15. WHO. Comprehensive cervical cancer prevention and control: a healthier future for girls and women,  
716 Geneva, Switzerland, 2013. [http://apps.who.int/iris/bitstream/10665/78128/3/9789241505147\\_eng.pdf](http://apps.who.int/iris/bitstream/10665/78128/3/9789241505147_eng.pdf)
- 717 16. DeCherney A, Nathan L, Goodwin TM, et al. *Current Diagnosis and Treatment: Obstetrics and*  
718 *Gynecology*. 10th ed. McGraw-Hill: Appleton and Lange; 2012.
- 719 17. Mandelblatt JS, Lawrence WF, Gaffikin L, Limpahayom KK, Lumbiganon P, et al. Costs and benefits  
720 of different strategies to screen for cervical cancer in less-developed countries. *J Natl Cancer Inst*. 2002;  
721 94: 1469-1483. <https://www.ncbi.nlm.nih.gov/pubmed/12359856>
- 722 18. Hailu A, Mariam DH. Patient side cost and its predictors for cervical cancer in Ethiopia: a cross sectional  
723 hospital based study. *BMC Cancer*. 2013; 13:69. <https://doi.org/10.1186/1471-2407-13-69>
- 724 19. Gakidou, E, Nordhagen S, Obermeyer Z. Coverage of cervical cancer screening in 57 countries: low  
725 average levels and large inequalities. *PLoS Med*. 2008; 5:e132. Pubmed: 18563963
- 726 20. Waktola EA, Mihret W, Bekele L. HPV and burden of cervical cancer in east Africa. *Gynecol Oncol*  
727 2005; 99(3 Suppl 1):S201–S202. pubmed/16419208
- 728 21. Bruni L, Barrionuevo-Rosas L, Albero G, Serrano B, Mena M, Gómez D, et al. ICO Information Centre  
729 on HPV and Cancer (HPV Information Centre). Human Papillomavirus and Related Cancers in Ethiopia.  
730 Fact Sheet 2016. Available at <http://www.hpvcentre.net/statistics/reports/XWX.pdf>.

- 731 22. Bekele L. Evaluation of serological response to oncoproteins of human papilloma virus type 16 And 18  
732 as potential seromarkers for cervical cancer screening. Addis Ababa University, Ethiopia, 2005.  
733 <https://www.omicsonline.org/open-access/trends-of-cervical-cancer-in-ethiopia-ccoa-1000103.pdf>
- 734 23. HPV report, 2017. [http://www.hpvcentre.net/statistics/reports/ETH\\_FS.pdf](http://www.hpvcentre.net/statistics/reports/ETH_FS.pdf)
- 735 24. WebMD. Cancer health Center. <http://www.webmd.com/cancer/default.htm>
- 736 25. Yu FQ, Murugiah MK, Mehmood T. Meta-synthesis Exploring Barriers to Health Seeking Behaviour  
737 among Malaysian Breast Cancer Patients; Asian Pac J Cancer Prev. 2015; 16(1):145–152.  
738 <https://www.ncbi.nlm.nih.gov/pubmed/25640342>. PMID: 25640342
- 739 26. Anim JT. Breast cancer in sub-Saharan African women. Afr J Med Med Sci. 1993; 22(1): 5–10.  
740 <https://www.ajol.info/index.php/ajrh/article/viewFile/144709/134371>
- 741 27. FMOH: National Strategic Action Plan (NSAP) for prevention & control of non-communicable diseases  
742 in Ethiopia from 2014–2016. [https://www.iccp-portal.org/system/files/plans/ETH\\_B3](https://www.iccp-portal.org/system/files/plans/ETH_B3).
- 743 28. Bekele C, Abdul-Rauf S, Bridgette G, Sarah R. A survey of knowledge and attitudes relating to cervical  
744 and breast cancer among women in Ethiopia. BMC Public Health. 2018; 18:1072.  
745 <https://bmcpublichealth.biomedcentral.com/articles/10.1186/s12889-018-5958-8>
- 746 29. Birhanu Z, Abdissa A, Belachew T, et al. Health seeking behavior for cervical cancer in Ethiopia: a  
747 qualitative study. Int J Equity Health. 2012; 11:83.  
748 <https://equityhealthj.biomedcentral.com/articles/10.1186/1475-9276-11-83>
- 749 30. Gichangi P, Estambale B, Bwayo J, Rogo K, Ojwang S, et al. Knowledge and practice about cervical  
750 cancer and Pap smear testing among patients at Kenyatta National Hospital, Nairobi, Kenya. Int J  
751 Gynecol Cancer. 2003; 13: 827-833. [pubmed/14675320](https://pubmed.ncbi.nlm.nih.gov/14675320/)
- 752 31. Rengaswamy S, et al. HPV Screening for Cervical Cancer in Rural India. The New England Journal of  
753 medicine. 2009; 360 (14): 1385-1394. [pubmed/19339719](https://pubmed.ncbi.nlm.nih.gov/19339719/)
- 754 32. Ralston JD , Taylor VM, Yasui Y, Kuniyuki A, Carey JJ, Shin-Ping T. Knowledge of cervical cancer  
755 risk factors among Chinese immigrants in Seattle. Journal of Community Health. 2003; 28 (1): 41–57.  
756 [PMC1618780/](https://pubmed.ncbi.nlm.nih.gov/1618780/)
- 757 33. Price JH, Easton Susan AN, Telljohann SK, Patricia BW. Perceptions of cervical cancer and Pap smear  
758 screening behavior by women's sexual orientation. Journal of Community Health. 1996; 21 (2): 89–105.  
759 [pubmed/8728358](https://pubmed.ncbi.nlm.nih.gov/8728358/).

- 760 34. Saba S, Adamu A, Muluken G, Selamawit H, Wondimu A, Sefonias G, et al. Knowledge about cervical  
761 cancer and barriers toward cervical cancer screening among HIV- positive women attending public  
762 health centers in Addis Ababa city, Ethiopia. *Cancer Medicine*. 2018; 7(3):903–912. PMC5852347/
- 763 35. FMOH: Health Sector Transformation Plan 2015–2020. Addis Ababa. Oct.2015.  
764 [https://www.globalfinancingfacility.org/sites/gff\\_new/files/Ethiopia-health-system-transformation-](https://www.globalfinancingfacility.org/sites/gff_new/files/Ethiopia-health-system-transformation-plan.pdf)  
765 [plan.pdf](https://www.globalfinancingfacility.org/sites/gff_new/files/Ethiopia-health-system-transformation-plan.pdf)
- 766 36. Broutet N. Interventions for encouraging sexual behaviours intended to prevent cervical cancer (last  
767 revised: 1 April 2012). The WHO Reproductive Health Library; Geneva: World Health Organization.  
768 Available from: [http://apps.who.int/rhl/gynaecology/cancer/cd001035\\_broutetn\\_com/en/](http://apps.who.int/rhl/gynaecology/cancer/cd001035_broutetn_com/en/).
- 769 37. FMOH. National cancer control plan 2016–2020. Addis Ababa, Oct. 2015. [https://www.iccp-](https://www.iccp-portal.org/sites/default/files/plans/NCCP%20Ethiopia%20Final%20261015.pdf)  
770 [portal.org/sites/default/files/plans/NCCP%20Ethiopia%20Final%20261015.pdf](https://www.iccp-portal.org/sites/default/files/plans/NCCP%20Ethiopia%20Final%20261015.pdf)
- 771 38. Underhill L, Bradfield D. *IntroSTAT*. 2nd Edition. Cape Town: Juta & Co, Ltd. 1998; 260-261.  
772 <http://www.introstat.co.za/Divisions/Consumables/Consumables-Intro.aspx>
- 773 39. Saad AKS, Suleiman I, Rukaiya A. Knowledge, attitude and practice of cervical cancer screening among market  
774 women in Zaria, Nigeria. *Niger Med J*. 2013; 54(5):316. PMC3883231/
- 775 40. Sudenga SL, Rositch AF, Otieno WA, Smith, JS. Knowledge, attitudes, practices, and perceived risk of  
776 cervical cancer among Kenyan women: brief report. *Int. J. Gynecol. Cancer*. 2013; 23:895–899.  
777 [pubmed/23694983](https://pubmed.ncbi.nlm.nih.gov/23694983/)
- 778 41. Lyimo FS, Beran TN. Demographic, knowledge, attitudinal, and accessibility factors associated with  
779 uptake of cervical cancer screening among women in a rural district of Tanzania: Three public policy  
780 implications *BMC Public Health*. 2012; 12:22 doi: 10.1186/1471-2458-1112-1122 PMID: 22233530.
- 781 42. Mingo AM, Panozzo CA, DiAngi YT, Smith JS, Steenhoff AP, Ramogola-Masire D, et al. Cervical  
782 cancer awareness and screening in Botswana. *Int J Gynecol Cancer*. 2012; 22: 638–644.  
783 [pubmed/22367370](https://pubmed.ncbi.nlm.nih.gov/22367370/)
- 784 43. Tebeu PM, Major AL, Rapiti E, Petignat P, Bouchardy C, Sando Z, et al. The attitude and knowledge of cervical cancer  
785 by Cameroonian women; a clinical survey conducted in Maroua, the capital of Far North Province of Cameroon.  
786 *Int J Gynecol Cancer*. 2008; 18(4):761–5. [pubmed/17868337](https://pubmed.ncbi.nlm.nih.gov/17868337/)
- 787 44. Ogunbode OO, Ayinde OA: Awareness of cervical cancer and screening in a Nigerian female market  
788 population. *Ann Afr Med* 2005, 4(4):160. <https://www.ajol.info/index.php/aam/article/view/8354>

- 789 45. Adanu RM: Cervical cancer knowledge and screening in Accra, Ghana. *J Wom Health Gend Base Med*  
790 2002, 11(6):487–488. pubmed/12225621
- 791 46. Belete N, Tsige Y, Mellie H. Willingness and acceptability of cervical cancer screening among women  
792 living with HIV/AIDS in Addis Ababa, Ethiopia: a cross sectional study. *BMC*, 2015; 2:6 [https://doi.org/](https://doi.org/10.1186/s40661-015-0012-3)  
793 10.1186/s40661-015-0012-3 <https://www.ncbi.nlm.nih.gov/pmc/articles/PMC4881166/> PMID:  
794 27231566
- 795 47. Yitagesu HA, Samuel YA, Tariku LE. Knowledge, attitude and practice for cervical cancer prevention  
796 and control among women of childbearing age in Hossana Town, Hadiya zone, Southern Ethiopia:  
797 Community-based cross-sectional study. *PLOS ONE*, 2017. [https://doi.org/10.1371/journal.](https://doi.org/10.1371/journal.pone.0163136)  
798 48. Mitiku I, Tefera F. Knowledge about Cervical Cancer and Associated Factors among 1549 Year Old  
799 Women in Dessie Town, Northeast Ethiopia. *PLoS ONE*. 2016; 11(9): e0163136.doi:10.1371/  
800 journal.pone.0163136.
- 801 49. Ezenwa BN, Balogun MR, Okafor IP. Mothers' human papilloma virus knowledge and willingness to vaccinate  
802 their adolescent daughters in Lagos, Nigeria. *Int J Wom Health*. 2013; 5:371–7.
- 803 50. Poole DN, Tracy JK, Levitz L, Rochas M, Sangare K, Yekta S, et al. A cross- sectional study to assess HPV knowledge  
804 and HPV vaccine acceptability in Mali. *PLoS One*. 2013; 8(2):e56402.
- 805 51. Makwe CC, Anorlu RI, Odeyemi KA. Human papillomavirus (HPV) infection and vaccines: knowledge, attitude and  
806 perception among female students at the University of Lagos, Lagos, Nigeria. *J Epidemiol Global Health*. 2012;  
807 2(4):199–206. pubmed/23856501
- 808 52. Francis SA, Battle-Fisher M, Liverpool J, Hipple L, Mosavel M, Soogun S, et al. A qualitative analysis of South African  
809 women's knowledge, attitudes, and beliefs about HPV and cervical cancer prevention, vaccine awareness and  
810 acceptance, and maternal-child communication about sexual health. *Vaccine*. 2011; 29(47):8760–5.
- 811 53. Blake KD, Ottenbacher AJ, Finney Rutten LJ, Grady MA, Kobrin SC, Jacobson RM, et al. Predictors of Human  
812 Papillomavirus Awareness and Knowledge in 2013: Gaps and Opportunities for Targeted Communication Strategies.  
813 *Am J Prev Med*. 2015; 48(4):402–10.
- 814 54. Deriemaeker H, Michiels D, Reichman G, Devroey D, Cammu H. Knowledge about human papillomavirus  
815 and the human papillomavirus vaccine in Belgian students. *Central European J Urol*. 2014; 67(4):410–7.
- 816 55. Ezem BU. Awareness and uptake of cervical cancer screening in Owerri, South- Eastern Nigeria. *Ann*  
817 *Afr Med*. 2007; 6: 94-98.

- 818 56. Mulatu K, Motma A, Seid M, et al. Assessment of Knowledge, Attitude and Praticce on Cervical Cancer  
819 Screening among Female Students of Mizan Tepi University, Ethiopia, 2016. *Cancer Biol Ther Oncol*.  
820 2017, 1:1.
- 821 57. Ali-Risasi, CP, Mulumba K, Verdonck D, Vanden B, Praet M. Knowledge, attitude and practice about  
822 cancer of the uterine cervix among women living in Kinshasa, the Democratic Republic of Congo. *BMC*  
823 *Women's Health*. 2014; 14:30. doi: 10.1186/1472-6874-14-30 PMID: 24548698.
- 824 58. Mingo AM, Panozzo CA, DiAngi YT, Smith JS, Steenhoff AP, Ramogola-Masire D, et al. Cervical  
825 cancer awareness and screening in Botswana. *Int. J Gynecol Cancer*. 2012; 22: 638–644.
- 826 59. Ebu, NI, Mupepi SC, Siakwa MP, Sampsellem CM. Knowledge, practice, and barriers toward cervical  
827 cancer screening in Elmina, Southern Ghana. *Int J Womens Health*. 2015; 7:31–39.
- 828 60. Gulendam K, Zeynep G, Ramazan S, Esen S, Fulya B. Awareness and Practices for Breast and Cervical  
829 Cancer among Turkish Women. *Asian Pacific Journal of Cancer Prevention*. 2014; 15: 1093-1098. DOI:  
830 <http://dx.doi.org/10.7314/APJCP.2014.15.3.1093>
- 831 61. Shah V, Vyas S, Singh A, Shrivastava M. Awareness and knowledge of cervical cancer and its prevention  
832 among the nursing staff of a tertiary health institute in Ahmedabad, Gujarat, India. *Ecancer*. 2012; 6:270  
833 DOI: 10.3332/ecancer.2012.270.
- 834 62. Al-Naggar RA, Low WY, Isa ZM. Knowledge and barriers towards cervical cancer screening among  
835 young women in Malaysia. *Asian Pac J Cancer Prev*. 2010; 11(4):867–873.
- 836 63. Nganwai P, Truadpon P, Inpa C, Sangpetngam B, Mekjarasnapa M, et al. Knowledge, attitudes and  
837 practices vis-a-vis cervical cancer among registered nurses at the Faculty of Medicine, Khon Kaen  
838 University, Thailand *Asian Pac J Cancer Prev*. 2008; 9: 15–18.
- 839 64. Anya SE, Oshi DC, Nwosu SO, et al. Knowledge, attitude and practice of female health professionals  
840 regarding cervical cancer and Pap smear. *Niger J Med*. 2005; 14: 283–6 9.
- 841 65. Hoque M, Hoque E, Kader SB. Evaluation of cervical cancer screening program at a rural community of  
842 South Africa. *East Afr J Publ Health*. 2008; 5(2):111.
- 843 66. Temel AB, Şafak D, Şenay K, Renginar ÖD, Zeynep A. Effect of structured training programme on the  
844 knowledge and behaviors of breast and cervical cancer screening among the female teachers in Turkey.  
845 *BMC Women's Health*. 2017; 17:123.
- 846 67. Saha A, Chaudhury AN, Bhowmik P, Chatterjee R. Awareness of cervical cancer among female students  
847 of premier colleges in Kolkata, India. *Asian Pac J Cancer Prev*. 2010; 11, 1085-90.



- 848 68. Ertem G. Awareness of cervical cancer risk factors and screening behavior among nurses in rural Turkey.  
849 Asian Pac J Cancer Prev. 2009; 10:735–8.
- 850 69. Wong LP, Wong YL, Low WY, Khoo EM, Shuib R. Knowledge and awareness of cervical cancer and  
851 screening among Malaysian women who have never had a Pap smear: A qualitative study. Singapore  
852 Med J. 2009; 50: 49-53.
- 853 70. Dhendup T, Tshering P. Cervical cancer knowledge and screening behaviors among female university  
854 graduates of the year 2012 attending the national graduate orientation program, Bhutan. BMC Women’s  
855 Health. 2014; 14(1):44.
- 856 71. McCarey C, et al. Awareness of HPV and cervical cancer prevention among Cameroonian healthcare  
857 workers. BMC Women’s Health. 2011; 11: 45. <http://www.biomedcentral.com/1472-6874/11/45>.
- 858 72. Ali SF, Ayub S, Manzoor NF, Azim S, Afif M, et al. Knowledge and awareness about cervical cancer  
859 and its prevention amongst interns and nursing staff in tertiary care hospitals in Karachi, Pakistan PLoS  
860 ONE. 2010; 5(6): e11059. DOI: 10.1371/journal.pone.0011059
- 861 73. Amos DM, Christopher GO, Edward MW, Georgios L, Henry W, Martin R. Awareness of cervical cancer  
862 risk factors and symptoms: cross-sectional community survey in post-conflict northern Uganda.  
863 Published by John Wiley & Sons Ltd. 2015. doi: 10.1111/hex.12382
- 864 74. Assoumou SZ, Mabika BM, Mbiguino AN, Mouallif M, Khattabi A, Ennaji M. Awareness and  
865 knowledge regarding of cervical cancer, Pap smear screening and human papillomavirus infection in  
866 Gabonese women. BMC Women’s Health. 2015; 15:37. Available from: [https://doi.org/10.1186/s12905-](https://doi.org/10.1186/s12905-015-0193-2)  
867 [015-0193-2](https://doi.org/10.1186/s12905-015-0193-2) PMID: 25924940
- 868 75. Peter NA, Navkiran KS. Cervical cancer screening among college students in Ghana: Knowledge and  
869 health beliefs. Int J Gynecol Cancer. 2009; 19: 412-6.
- 870 76. Aweke YH, Ayanto SY, Ersado TL. Knowledge, attitude and practice for cervical cancer prevention and  
871 control among women of childbearing age in Hossana Town, Hadiya zone, SouthernEthiopia:  
872 Community-based crosssectional study. PLoS ONE. 2017; 12(7): e0181415.  
873 <https://doi.org/10.1371/journal.pone.0181415>
- 874 77. MwakaM M, Amos D, Orach CG, Were EM, Lyratzopoulos G, Wabinga HRM. Awareness of cervical  
875 cancer risk factors and symptoms: cross-sectional community survey in post-conflict northern Uganda.  
876 IJPP Health Expect. 2016; 19 (4): 854–867. Available from:  
877 <https://www.ncbi.nlm.nih.gov/pmc/articles/PMC4957614/>

- 878 78. Ahmed SA, Sabitu K, Idris SH, Ahmed R. Knowledge, attitude and practice of cervical cancer screening  
879 among market women in Zaria, Nigeria. *Niger Med J.* 2013; 54(5): 316–9. [https://doi.org/10.4103/0300-](https://doi.org/10.4103/0300-1652.122337)  
880 1652.122337 Available from: <https://www.ncbi.nlm.nih.gov/pmc/articles/PMC3883231/>. PMID:  
881 24403709
- 882 79. Lee PW, Kwan TT, Tam KF, et al. Beliefs about cervical cancer and human papillomavirus (HPV) and  
883 acceptability of HPV vaccination among Chinese women in Hong Kong *Prev Med.* 2007; 45: 130-4.
- 884 80. Oh JK, Lim MK, Yun EH, Lee EH, Shin HR. Awareness of and attitude towards human papillomavirus  
885 infection and vaccination for cervical cancer prevention among adult males and females in Korea: A  
886 nationwide interview survey. *Vaccine.* 2010; 28: 1854-60.
- 887 81. Ingledue K, Cottrell R, Bernard A. College women’s knowledge, perceptions, and preventive behaviors  
888 regarding human papillomavirus infection and cervical cancer. *Am J Hlth Studies.* 2004; 19: 28-34.
- 889 82. Lopez R, McMahan S. College women’s perception and knowledge of human papillomavirus (HPV) and  
890 cervical cancer. *Californian J Hlth Promotion.* 2007; 5: 12-25.
- 891 83. Phillips Z, Johnson S, Avis M, et al. Human papillomavirus and the value of screening: Young women’s  
892 knowledge of cervical cancer. *Hlth Edu Res.* 2003; 18: 318-28.
- 893 84. Klug SJ, Hukelmann M, Blettner M. Knowledge about infection with human papillomavirus: A  
894 systematic review. *Prev Med.* 2008; 46: 87-98.
- 895 85. Abbey BB, Mahbubur R, Jacqueline MH, Richard ER, Kwabena OS. A brief educational intervention  
896 increases providers’ human papillomavirus vaccine knowledge, *Human Vaccines &*  
897 *Immunotherapeutics.* 2015; 11(6): 1331-1336. DOI: 10.1080/21645515.2015.1022691.
- 898 86. Ozsurekci Y, Karadag OE, Bayhan C, Celik M, Ozkaya-Parlakay A, Arvas M, Ceyhan M. Knowledge  
899 and attitudes about human papillomaviruses and immunization among Turkish pediatricians. *Asian*  
900 *Pacific J of Cancer Prevention.* 2013; 14:7325-9; PMID: 24460296; [Doi:](https://doi.org/10.7314/APJCP.2013.14.12.7325)  
901 [10.7314/APJCP.2013.14.12.7325](https://doi.org/10.7314/APJCP.2013.14.12.7325).
- 902 87. McSherry LA, Dombrowski SU, Francis JJ, Murphy J, Martin CM, O’Leary JJ, Sharp L; ATHENS  
903 Group. ’It’s a can of worms’: understanding primary care practitioners’ behaviours in relation to HPV  
904 using the Theoretical Domains Framework. *Implement Sci.* 2012; 7:73; PMID: 22862968.
- 905 88. Saraiya M, Rosser JI, Cooper CP. Cancers that U.S. physicians believe the HPV vaccine prevents:  
906 findings from a physician survey, 2009. *J Womens Health (Larchmt).* 2012; 21:111-7; PMID: 22216920;  
907 [http:// dx.doi.org/10.1089/jwh.2011.3313](http://dx.doi.org/10.1089/jwh.2011.3313).

- 908 89. Makwe CC, Anorlu RI. Knowledge of and attitude toward human papillomavirus infection and vaccines  
909 among female nurses at a tertiary hospital in Nigeria. *Int J Womens Health*. 2011; 3:313-7;  
910 PMID:21976985; <http://dx.doi.org/10.2147/IJWH.S22792>
- 911 90. Daley MF, Crane LA, Markowitz LE, Black SR, Beaty BL, Barrow J, Babbel C, Gottlieb SL, Liddon N,  
912 Stokley S, et al. Human papillomavirus vaccination practices: a survey of U.S. physicians 18 months  
913 after licensure. *Pediatrics*. 2010; 126:425-33; PMID: 20679306; [http://dx.doi.org/10.1542/peds.2009-](http://dx.doi.org/10.1542/peds.2009-3500)  
914 3500.
- 915 91. Varughese NR, Samuel CJ, Dabas P. Knowledge and practices of cervical cancer screening among  
916 married women in a semi-urban population of Ludhiana, Punjab. *CHRISMED J Health Res*. [serial  
917 online] 2016; [cited 2017 Jun 12]; 3:51–4. Available from: [http://www.cjhr.org/text.asp?2016/3/1/51/](http://www.cjhr.org/text.asp?2016/3/1/51/172401)  
918 172401.
- 919 92. Poonam RN, Nagaraj K, Abhay SN. Awareness of cervical cancer and effectiveness of educational  
920 intervention programme among nursing students in a rural area of Andhra Pradesh. *Healthline*. 2012; 3  
921 (2): 41-45.
- 922 93. Sawadogo B, Gitta SN, Rutebemberwa E, Sawadogo E, Meda N. Knowledge and beliefs on cervical  
923 cancer and practices on cervical cancer screening among women aged 20 to 50 years in Ouagadougou,  
924 Burkina Faso, 2012: a cross- sectional study. *Pan Afr Med J*. 2014; 18:175.
- 925 94. Awodele O, Adeyomoye AAA, Awodele DF, Kwashi V, Awodele IO, Dolapo DC. A Study on Cervical  
926 Cancer Screening Amongst Nurses in Lagos University Teaching Hospital, Lagos, Nigeria. *J Canc Educ*.  
927 2011; 26: 497-504.
- 928 95. Chinwe RE, UdeNebonta AR. Impact of Health Education on Knowledge, Attitude and Practice of  
929 Cervical Cancer Screening Among Secondary School Teachers in Enugu State. *J Women’s Health Care*.  
930 2015; 4: 241. doi:10.4172/2167-0420.1000241.
- 931 96. Udigwe GO. Knowledge, attitude and practice of cervical cancer screening (Pap smear) among female  
932 nurses in Nnewi, South Eastern Nigeria. *Niger J Clin Practice*. 2006; 9(1): 40–43.
- 933 97. Ladner J, Besson MH, Audureau E, Rodrigues M, Saba J. Experiences and lessons learned from 29 HPV  
934 vaccination programs implemented in 19 low and middle-income countries. *BMC Health Serv Res*. 2016;  
935 2009–14. [https:// doi.org/10.1186/s12913-016-1824-5](https://doi.org/10.1186/s12913-016-1824-5).
- 936 98. Paul P, Fabio A. Literature review of HPV vaccine delivery strategies: considerations for school- and  
937 non-school based immunization program. *Vaccine*. 2014; 32(3):320–6.

- 938 99. Bailey HH, et al. American Society of Clinical Oncology Statement: Human Papillomavirus Vaccination  
939 for Cancer Prevention. *J Clin Oncol*. 2016; 34(15): 1803–12. <https://doi.org/10.1200/JCO.2016.67.2014>.
- 940 100. Tariku R. Correlates of knowledge on cervical cancer among female students of the college of health  
941 science. Addis Ababa University. 2016.
- 942 101. Bebis H, Reis N, Yavan T, Bayrak D, Unal A, Bodur S. Effect of health education about cervical cancer  
943 and papanicolaou testing on the behavior, knowledge, and beliefs of Turkish women. *Int J Gynecol*  
944 *Cancer*. 2012; 22: 1407-12.
- 945 102. Senol V, Balci E, Cetinkaya F, Balci F. Women's knowledge and behavior on cervical cancer, in Kayseri,  
946 Turkey. *Turkiye Klinikleri J Med Sci*. 2012. 32: 694-701.
- 947 103. Bayoumi MM, Elbasuny MM, Nasser AMA, Abdullah KM, Almatery NMA. Saudi young females' level  
948 of knowledge regarding cervical and breast cancer. *Int Journal of Nursing Science*. 2012; 2: 47-52.
- 949 104. Ak M, Canbal M, Turan S, Gurbuz N. Attitude concerning the Pap smear test of women who admitted  
950 to the family medicine outpatient clinic. *Konuralp Med J*. 2010; 2: 1-4.
- 951 105. Mary B, Linnette D'Sa J. Evaluation of an Educational Program on Cervical Cancer for Rural Women  
952 in Mangalore, Southern India. *Asian Pacific Journal of Cancer Prevention*. 2014; 15: 6603-08.
- 953 106. Risi L, Bindman JP, Campbell OM, Imrie J, Everett K, Bradley J, Denny L. Media interventions to  
954 increase cervical screening uptake in South Africa: an evaluation study of effectiveness. *Health Educ*  
955 *Res*. 2004; 19(4): 457–68.
- 956 107. Chadza E, Chirwa E, Maluwa A, Malata A, Kazembe A, Chimwaza A. Factors that contribute to delay  
957 in seeking cervical cancer diagnosis and treatment among women in Malawi. *Health*. 2012; 4 (11): 1015-  
958 22.
- 959 108. Mausumi B, Showket H, Vilas N, Bhudev CD. HPV & HPV vaccination: Issues in developing countries.  
960 *Indian J Med Res*. 2009; 130: 327–333.
- 961 109. Neerja B, Elizabeth J. Cervical cancer prevention & the role of human papillomavirus vaccines in India.  
962 *Indian J Med Res*. 2009; 130: 334–340.
- 963 110. Pandey D, Vanya V, Bhagat S, VS B, Shetty J. Awareness and Attitude towards Human Papillomavirus  
964 (HPV) Vaccine among Medical Students in a Premier Medical School in India. *PLoS ONE*. 2012; 7(7):  
965 e40619. doi:10.1371/journal.pone.0040619.

- 966 111. Evelyn CI, Chidinma PA, Maug A, Pauline EJ. Increasing Cervical Cancer Awareness and Screening in  
967 Jamaica: Effectiveness of a Theory-Based Educational Intervention. *Int J Environ Res Public Health*.  
968 2016; 13: 53.
- 969 112. Duval B, Gilca V, McNeil S, Dobson S, Money D, Gemmill IM, Sauvageau C, Lavoie F, Ouakki M.  
970 Vaccination against human papillomavirus: a baseline survey of Canadian clinicians' knowledge,  
971 attitudes and beliefs. *Vaccine*. 2007; 25: 7841-7; PMID: 17923173;  
972 <http://dx.doi.org/10.1016/j.vaccine.2007.08.041>.
- 973 113. Ajah LO, Iyoke CA, Ezeonu PO, Ugwu GO, Onoh RC, Ibo CC. Association between Knowledge of  
974 Cervical Cancer/Screening and Attitude of Teachers to Immunization of Adolescent Girls with Human  
975 Papilloma Virus Vaccine in Abakaliki, Nigeria. *American Journal of Cancer Prevention*. 2015; 3(1): 8-  
976 12.
- 977 114. Kangkana B, Nijara R, Lipi BM, Pallabi S, Dipankar D. Assessing the awareness level of breast and  
978 cervical cancer: a cross-sectional study in northeast India. 2016. DOI:  
979 10.5455/ijmsph.2016.28012016409.
- 980 115. Musa J, Achenbach CJ, O'Dwyer LC, Evans CT, McHugh M, Hou L, et al. Effect of cervical cancer  
981 education and provider recommendation for screening on screening rates: A systematic review and meta-  
982 analysis. *PLoS ONE*. 2017; 12(9): e0183924. <https://doi.org/10.1371/journal.pone.0183924>.
- 983 116. Harmeet K, Bandana B. Assessing the Impact of Awareness program on Breast and Cervical Cancer  
984 Knowledge Empowerment among Working Women in Education Sector. *Journal of Multidisciplinary  
985 Research in Healthcare*. 2014; 1(1): 19–31.
- 986 117. Lambert EC. College students' knowledge of human papillomavirus and effectiveness of a brief  
987 educational intervention. *J Am Board Fam Prac*. 2001; 14: 178-83.
- 988 118. Choi SY. Development of an educational program to prevent cervical cancer among immigrants in  
989 Korea. *Asian Pac J Cancer Prev*. 2013; 14: 5345-9.
- 990 119. Fernandes P. Preventing carcinoma cervix among women through teaching programs. *Nightingale  
991 Nursing Times*. 2011; 6: 6-8.
- 992 120. Wright KO, Kuyinu Y, Faduyile A. Community education on cervical cancer amongst market women in  
993 an urban area of Lagos, Nigeria. *Asian Pac J Cancer Prev*. 2010; 11: 137-40.

- 994 121. Teresa J, Brijesh S, Chacchu B, Jenny C. Awareness of Cervix Cancer Risk Factors in Educated Youth:  
995 A Cross-Sectional, Questionnaire Based Survey in India, Nepal, and Sri Lanka. *Asian Pacific Journal of*  
996 *Cancer Prevention*. 2011; 12: 1707-1711.
- 997 122. Maree JE, Wright SC, Makua TP. Men's lack of knowledge adds to the cervical cancer burden in South  
998 Africa. *European Journal of Cancer Care*. 2011; 20: 662–668.
- 999 123. Gatune JW, Nyamongo IK. An ethnographic study of cervical cancer among women in rural Kenya: is  
1000 there a folk causal model? *International Journal of Gynecological Cancer*. 2005; 15: 1049–1059.
- 1001 124. Duval TS, Silvia PJ. Self-awareness, probability of improvement, and the self-serving bias. *Journal of*  
1002 *Personality and Social Psychology*. 2002; 82: 49–61.
- 1003 125. Blaine B, Crocker J. Self-esteem and self-serving biases in reactions to positive and negative events: an  
1004 integrative review. In: Baumeister R (ed.) *Self Esteem*. Plenum Press, New York, USA, 1993: 55–85.
- 1005 126. Bradley GW. Self-serving biases in the attribution process: a reexamination of the fact or fiction question.  
1006 *Journal of Personality and Social Psychology*. 1978; 36: 56–71.
- 1007 127. Perkins RB, Sarah Langrish, Linda Jo Stern, Carol J. Simon. A community-based education program  
1008 about cervical cancer improves knowledge and screening behavior in Honduran women. *Pan Am J Public*  
1009 *Health*. 2007; 22(3): 187-193.
- 1010 128. Agurto I, Arrossi S, White S, et al. Involving the community in cervical cancer prevention programs. *Int*  
1011 *J Gynaecol Obstet*. 2005; 89 Suppl 2: S38–45.
- 1012 129. Austin LT, Ahmad F, McNally MJ, Stewart DE. Breast and cervical cancer screening in Hispanic  
1013 women: a literature review using the health belief model. *Womens Health Issues*. 2002; 12(3):122–8.
- 1014 130. Thani AA, Aizeldin E, Mohamad AT, Rasha ES. Impact of Health Education on Utilization of Cervical  
1015 Cancer Screening Services among Females Working in Secondary Schools in Doha. *Middle East J of*  
1016 *Family Medicine*. 2012; 10 (4): 10-19.
- 1017 131. Papa D, Moore Simas TA, Reynolds M, Melnitsky H. Assessing the role of education in women's  
1018 knowledge and acceptance of adjunct high risk human Pappilomavirus testing for cervical cancer  
1019 screening. *J Low Genit Tract Dis*. 2009; 13 (2): 66-71.
- 1020 132. Lin HH, Chen SH, Jeng SY, Chen HM. A project to improve the screening rate of Pap smear for cervical  
1021 cancer. *Hu Li Za Zhi*. 2007; 54 (1): 62-69.

- 1022 133.Hoque ME, Van Hal G. Acceptability of human papillomavirus vaccine: a survey among Master of  
1023 Business Administration students in KwaZulu-Natal, South Africa. *Biomed Res Int.* 2014;257807.  
1024 doi:10.1155/2014/257807.
- 1025 134.Chang IJ, Huang R, He W, et al. Effect of an educational intervention on HPV knowledge and vaccine  
1026 attitudes among urban employed women and female undergraduate students in China: a cross-sectional  
1027 study. *BMC Pub Health.* 2013; 13:916.
- 1028 135.Basu P, Mittal S. Acceptability of human papillomavirus vaccine among the urban, affluent and educated  
1029 parents of young girls residing in Kolkata, Eastern India. *J Obstet Gynaecol Res.* 2011; 37(5):393–401.
- 1030 136.Aswathy S, Quereshi MA, Kurian B, Leelamoni K. Cervical cancer screen-ing: current knowledge and  
1031 practice among women in a rural population of Kerala, India. *Indian J Med Res.* 2012; 136: 205-10.
- 1032 137.Ezeanochie MC, Olagbuji BN. Human papilloma virus vaccine: determinants of acceptability by mothers  
1033 for adolescents in Nigeria. *Afr J Reprod Health.* 2014; 18(3):154–8.
- 1034 138.Hoquea ME. Acceptability of human papillomavirus vaccination among academics at the University of  
1035 KwaZulu-Natal, South Africa. *South African Family Practice.* 2015; 57(5): 318–321.
- 1036 139.Perlman S, Wamai RG, Bain PA, et al. Knowledge and awareness of HPV vaccine and acceptability to  
1037 vaccinate in Sub-Saharan Africa: a systematic review. *PLoS ONE.* 2014; 9(3):e90912.  
1038 doi:10.1371/journal.pone.0090912.
- 1039 140.Ports KA, Reddy DM, Rameshbabu A. Barriers and facilitators to HPV vaccination: perspectives from  
1040 malawian women. *Women Health.* 2013; 53(6):630–45.
- 1041 141.Hopfer S. Effects of a narrative HPV vaccination intervention aimed at reaching college women: a  
1042 randomized controlled trial. *Prev Sci.* 2012; 13:173–82.
- 1043 142.Remes P, Selestine V, Changalucha J, et al. A qualitative study of HPV vaccine acceptability among  
1044 health workers, teachers, parents, female pupils, and religious leaders in northwest Tanzania. *Vaccine.*  
1045 2012; 30 (36): 5363–7.
- 1046 143.Reiter PL, Stubbs B, Panozzo CA, et al. HPV and HPV vaccine education intervention: effects on parents,  
1047 healthcare staff, and school staff. *Cancer Epidemiol Biomarkers Prev.* 2011; 20(11):2354–61.
- 1048 144.Markowitz LE, Dunne EF, Saraiya M, et al. Quadrivalent human papillomavirus vaccine:  
1049 recommendations of the advisory committee on immunization practices (ACIP). *MMWR Recomm Rep.*  
1050 2007; 56(RR-2):1–24.

- 1051 145. Gana GJ, Oche MO, Ango JT, Raji MO, Okafoagu NC. Effect of an educational program on awareness  
1052 of cervical cancer and uptake of Pap smear among market women in Niger State, North Central Nigeria.  
1053 *J. Public Health Epidemiology*. 2016; 8(10): 211-219.
- 1054 146. Wright KO, Faseru B, Kuyinu YA, Faduyile FA. Awareness and uptake of the Pap smear among market  
1055 women in Lagos, Nigeria. *J. Public Health Afr*. 2011; 2(1):e14.
- 1056 147. Sarah FK, Catherine W, May Maloba NM, Florence NM, Elizabeth B. Cervical cancer prevention and  
1057 treatment research in Africa: a systematic review from a public health perspective. *BMC Women's*  
1058 *Health*. 2016; 16(29): 1-25.
- 1059 148. Songthap A, Pitisuttithum P, Kaewkungwal J, Fungladda W, Bussaratid V. Knowledge, attitudes, and  
1060 acceptability of a human papilloma virus vaccine among students, parents and teachers in Thailand.  
1061 *Southeast Asian J Trop Med Public Health*. 2012; 43(2): 340-53.
- 1062 149. Smith PJ, Humiston SG, Marcuse EK, et al. Parental delay or refusal of vaccine doses, childhood  
1063 vaccination coverage at 24 months of age, and the health belief model. *Public Health Rep*. 2011;  
1064 126(2):135–46.
- 1065 150. Byrd TL, Wilson KM, Smith JL, Coronado G, Vernon SW, Fernandez-Esquer ME, et al. AMIGAS: a  
1066 multicity, multicomponent cervical cancer prevention trial among Mexican American women. *Cancer*.  
1067 2013; 119(7): 1365–72. Epub 2013/01/03. <https://doi.org/10.1002/cncr.27926> PMID: 23280399.
- 1068 151. Jeong SJ Saroha E, Knight J, Rooffe M, Jolly PE. Determinants of adequate follow-up of an abnormal  
1069 Papanicolaou result among Jamaican women in Portland, Jamaica. *Cancer Epidemiol*. 2011; 35: 211–  
1070 216. [PubMed]
- 1071 152. Nuno T, Martinez ME, Harris R, Garcia F. A Promotora-administered group education intervention to  
1072 promote breast and cervical cancer screening in a rural community along the U.S.-Mexico border: a  
1073 randomized controlled trial. *Cancer causes & control: CCC*. 2011; 22(3): 367–74. Epub 2010/12/25.  
1074 <https://doi.org/10.1007/s10552-010-9705-4> PMID: 21184267.
- 1075 153. Mishra SI, Luce PH, Baquet CR. Increasing Pap smear utilization among Samoan women: results from  
1076 a community based participatory randomized trial. *Journal of health care for the poor and underserved*.  
1077 2009; 20(2 Suppl): 85–101. Epub 2009/08/28. PMID: 19711495.
- 1078 154. Wagner C, Semmler C, Good A, Wardle J. Health literacy and self-efficacy for participating in  
1079 colorectal cancer screening: the role of information processing. *Patient Educ Couns*. 2009; 75  
1080 (3): 352–357.



- 1081 155.Lindau ST, Basu A, Leitsch SA. Health literacy as a predictor of follow-up after an abnormal Pap  
 1082 smear: a prospective study. *J Gen Intern Med.* 2006; 21: 829–834.
- 1083 156.Hou SI, Fernandez ME, Baumler E, Parcel GS. Effectiveness of an intervention to increase Pap test  
 1084 screening among Chinese women in Taiwan. *Journal of community health.* 2002; 27(4):277–90. Epub  
 1085 2002/08/23. PMID: 12190056.
- 1086 157.Lindau ST, Tomori C, Lyons T, Langseth L, Bennett CL, Garcia P. The associa- tion of health literacy  
 1087 with cervical cancer prevention knowledge and health behav- iors in a multiethnic cohort of women.  
 1088 *Am J Obstet Gynecol.* 2002; 186 (5): 938–943.
- 1089 158.Nguyen TT, McPhee SJ, Nguyen T, Lam T, Mock J. Predictors of cervical Pap smear screening  
 1090 awareness, intention, and receipt among Vietnamese-American women. *Am J Prev Med.* 2002; 23: 207–  
 1091 214.
- 1092 159.Valdez A, Banerjee K, Ackerson L, Fernandez M. A multimedia breast cancer education intervention for  
 1093 low-income Latinas. *J Community Health.* 2002; 27: 33–51. [PubMed]
- 1094 160.Kaur S, Kaur B. A descriptive study to assess the awareness of the women re-garding cervical cancer.  
 1095 *Int J Nurs Educ.* 2012; 4: 66-8.
- 1096 161.Alsaad MA, Shamsuddin K, Fadzil F. Knowledge towards HPV infection and HPV vaccines among  
 1097 Syrian Mothers. *Asian Pac J Cancer Prev.* 2012; 13: 879-83.

1098 **Supporting information captions**

1099 **The table in the Appendix**

1100 Table A1: McNemar test of various knowledge levels grouped as no, poor, fair, and good cervical cancer awareness about symptoms, risk  
 1101 factors, HPV, screening and vaccination of respondents at P=0.000 significance level.

| Domain                    | N=283/<br>McNemar<br>Value |
|---------------------------|----------------------------|
| Knowledge levels compared |                            |
| Symptoms                  | 215.18                     |
| Risk factors              | 163.63                     |
| HPV                       | 199.68                     |
| Screening                 | 202.88                     |
| Vaccination               | 190.52                     |

1106 Table A2: Significance of effect of various individual explanatory variables on overall awareness levels about CC

| Variable                 | Pre-intervention | Post-intervention |
|--------------------------|------------------|-------------------|
| Age                      | <b>0.229</b>     | <b>.216</b>       |
| Region                   | .300             | .255              |
| Rural/Urban              | .434             | .313              |
| Year of study            | <b>.231</b>      | <b>.066</b>       |
| Branch of study          | <b>.238</b>      | .414              |
| Marital status           | .458             | .596              |
| Religion                 | .550             | .540              |
| Father's education level | .301             | .409              |
| Mother's education level | .324             | .410              |
| Father's occupation      | .311             | .404              |
| Mother's occupation      | .305             | .523              |
| Family size              | .392             | .304              |

Family income .179 .480

1107

1108 Table A3: Various predictors relationship about CC at the P=0.05 significance level

|      | <b>Predictors relationship</b>                        | <b>Chi-square</b> | <b>Cramer's V</b> |
|------|-------------------------------------------------------|-------------------|-------------------|
| 1109 | Age category and Year of study                        | 103.82            | .606              |
| 1110 | Age category and Father's education level             | 14.82             | .229              |
|      | Age category and Mother's education level             | 7.04              | .158              |
|      | Year of study and Branch of study                     | 26.01             | .303              |
| 1111 | Branch of study and Family size                       | 7.47              | .163              |
|      | Father's education level and Mother's education level | 230.87            | .639              |
| 1112 | Father's education level and Family size              | 18.57             | .256              |
|      | Mother's education and Family size                    | 23.27             | .287              |

1113

1114
